# Supplementary material for: The Impact of Endoscopic Vein Harvest by Less Experienced Operators on Conduit Quality and Early Graft Patency
Source: Research Square preprint supplement (doi:10.21203/rs.3.rs-7280259/v1), 2025-09-26
Supplement: Supplementary file 1 [file 6db279037f61e8c9cbd2ac98.xlsx]

## Sheet: マッチング後論文執筆用 EVH biginer vs Exp
No	山形大学病院=B,日本海総合病院=A	性別	年齢(手術時)	複合手術=1,単独CABG=0	OPCAB=1,Pumpあり＝0	手術時間(分)	Pump時間(分)	心停止あり=1、なし=0	心停止時間	pump conversionあり=1なし=0	吻合数	LITA	RITA	RA	GEA	SVG使用あり=1なし=0	SVG使用(本)	SVG末梢側吻合数	SVG内視鏡下harvestあり=1,なし＝0	EVH_Beginner=1,Expert=2	SVG採取者,1=小林,2=中村,3=大場,4=愛,5=渡辺,6=水本,7=黒田,8=廣岡,9=林,10=山下,11=安本,12=舩田,13=堀井, 14=中嶋,15=金	SVG閉塞(本)	SVG閉塞No=0,yes=1	SVG閉塞までの期間(閉塞のないものは観察期間)ヶ月	下肢創部離開あり=1、なし=0	創部感染	SVGに50%未満の狭窄あり=1、なし=0	SVGに50%以上の狭窄あり=1なし=0	SVG吻合部の狭窄あり=1,なし=0	SVGへのre-interventionあり=1、なし=0	術中輸血あり=1,なし=0	身長	体重	BMI	BMI30以上=1,30未満=0	観察期間(ヶ月)2017年12月まで	心筋梗塞1=あり、0=なし	HL	HT	DM	DMインスリンあり=1,なし=0	家族歴あり=1なし=0	家族歴	current Smoker	喫煙歴あり=1なし=0	PCIあり=1,なし=0	PAD既往あり=1,なし=0	HDあり=1,なし=0	慢性腎不全
1	A	男	65	0	0	259	134	0		0	5	1	0	1	0	1	1	2	1	2	2	0	0	2	0	0	0	0	0	0	0	164	68.5	25.4685	0	2	1	1	1	1	0			1	1	0	0	0	0
2	A	男	77	1	0	238	120	1	29	0	2	1	0	0	0	1	1	1	0			0	0	7	0	0	0	0	0	0	1	160.2	59.35	23.1257	0	7	1	1	1	0	0	0	0	0	1	0	0	0	0
3	A	男	73	1	0	263	139	1	57	0	2	1	0	0	0	1	1	2	1	1	1	0	0	8	0	0	0	0	0	0	1	167	50.2	17.9999	0	8	1	1	1	0	0				0	0	0	0	0
4	A	男	84	0	0	139	51	0		0	2	1	0	0	0	1	1	1	0			0	0	8	0	0	0	0	0	0	1	163.4	57.1	21.3861	0	8	0	0	0	1	0			0	1	1	0	0	0
5	A	男	81	0	0	226	82	0		0	3	1	0	0	0	1	1	2	1	1	1, 13	0	0	11	0	0	0	0	0	0	1	164	45.2	16.8055	0	11	0	0	1	0	0			0	1	0	0	0	0
6	A	男	65	0	1	139		0		0	2	1	0	0	0	1	1	1	0			0	0	15	0	0	0	0	0	0	0	166.7	56.2	20.2239	0	15	1	0	1	0	0			1	1	0	0	0	0
7	A	男	75	0	1	172		0		0	2	1	0	0	0	1	1	1	0			0	0	16	0	0	0	0	0	0	1	166	64.6	23.4432	0	16	1	1	1	0	0			0	0	0	0	0	0
8	A	男	65	1	0	289	144	1	37	0	3	1	0	1	0	1	1	1	1	1	3	0	0	18	0	0	0	0	0	0	1	167.7	64.7	23.0058	0	18	1	0	1	1	0	0	0	0	1	0	1	0	0
9	A	男	62	0	1	314	146	0		0	3	1	0	0	0	1	1	1	0			0	0	22	0	0	0	0	0	0	0	172	71.45	24.1516	0	22	1	1	1	0	0	0	0	1	1	0	0	0	0
10	A	男	60	0	1	266	102	0		0	3	1	0	1	0	1	1	1	1	1	3	0	0	3	0	0	0	0	0	0	1	166.4	63.6	22.9694	0	3	1	1	1	0	0	0	0	0	1	0	0	0	0
11	A	男	59	0	0	232	105	0		0	4	1	0	1	0	1	1	1	1	1	3	0	0	23	0	0	0	0	0	0	0	167	76.9	27.5736	0	23	0	1	0	1	0	0	0	1	1	0	0	0	0
12	A	男	56	0	0	215	86	0		0	3	1	0	1	0	1	1	1	1	1	3	0	0	23	0	0	0	0	0	0	0	159.5	56.9	22.3661	0	23	1	1	1	0	0	0	0	0	1	0	0	0	0
13	A	女	69	0	1	279	135	0		0	5	1	0	1	0	1	1	2	1	1	5	0	0	24	0	0	0	1	0	0	1	153	57.5	24.5632	0	24	1	1	0	1	0	0	0	0	0	0	0	0	0
14	A	男	65	0	0	278	130	0		0	4	1	0	1	0	1	1	1	1	1	3	0	0	17	0	0	1	0	0	1	0	161	55.2	21.2955	0	17	1	1	0	1	0	0	0	0	0	0	0	0	0
15	A	男	73	0	0	225	82	0		0	3	1	0	1	0	1	1	1	0			0	0	31	0	0	0	0	0	0	0	168.1	60.9	21.5517	0	31	1	1	1	1	0	0	0	0	1	1	0	0	0
16	A	男	83	0	1	175		0		0	2	1	0	0	0	1	1	0	0			0	0	8	0	0	0	0	0	0	0	165	64.1	23.5445	0	8	0	1	0	0	0	0	0	0	1	0	0	0	0
17	A	男	64	0	0	413	179	0		0	3	1	0	1	0	1	1	0	0			0	0	29	0	0	0	0	0	0	1	162	58.5	22.2908	0	29	1	1	1	1	0	1	父、祖父	0	1	1	0	0	0
18	A	男	79	0	1	308	85	0		1	3	1	0	1	0	1	1	1	1	1	3	0	0	1	0	0	0	0	0	0	0	162	67.3	25.644	0	1	1	1	1	1	0	1	長男	0	0	1	0	0	0
19	A	男	67	0	1	256	104	0		0	3	1	0	0	0	1	2	2	1	1	3	0	0	4	0	0	0	0	0	0	1	172	79.4	26.8388	0	4	0	1	1	1	0	0	0	0		1	0	0	0
20	A	男	69	0	1	287	123	0		0	4	1	0	1	0	1	1	1	1	1	3	0	0	38	0	0	0	0	0	0	1	158.5	45.6	18.1512	0	38	0	1	0	0	0	0	0	0	0	1	0	0	1
21	A	男	75	0	1	185		0		0	2	1	0	0	0	1	1	1	1	1	11	0	0	1	0	0	0	0	0	0	0	157	47.3	19.1894	0	1	1	0	1	0	0	0	0	0	1	0	0	0	0
22	A	男	65	0	1	194		0		0	2	1	0	0	0	1	1	1	1	1	11	0	0	40	0	0	0	0	0	0	1	165	70.9	26.0422	0	40	1	0	1	0	0	0	0	0	1	0	0	0	0
23	A	男	71	0	0	388	306	0		0	3	0	0	1	0	1	1	1	0			0	0	1	0	0	0	0	0	0	1	171.5	78	26.5196	0	1	1	0	0	0	0	0	0	0		0	0	0	0
24	A	男	73	0	1	239		0		0	2	1	0	0	0	1	1	1	1	1	11	1	1	1	0	0	0	0	0	0	1	156	48.1	19.765	0	16	1	0	1	0	0	0	0	1	1	1	0	0	0
25	A	男	59	0	1	253	141	0		0	3	1	0	1	0	1	1	1	1	1	11	0	0	18	0	0	0	0	0	0	0	171	85.6	29.274	0	18	1	0	1	0	0	0	0	0	1	0	0	0	0
26	A	男	58	0	0	226	109	0		0	4	1	0	1	0	1	1	2	1	2	10	0	0	2	0	0	0	0	0	0	0	160.7	59.15	22.9046	0	2	1	1	1	1	0			0		0	0	0	0
27	A	男	81	0	0	271	113	0		0	4	1	0	0	0	1	2	4	1	1	11	0	0	48	0	0	0	0	0	0	0	169	47.7	16.7011	0	48	1	0	0	0	0	0	0	0		0	0	0	0
28	A	男	71	0	0	261	119	0		0	3	1	0	0	0	1	2	2	1	2	10	0	0	4	0	0	0	0	0	0	1	162.2	55.4	21.0576	0	4	1	0	1	1	1	0	0	0		0	0	0	0
29	A	男	84	0	0	242	96	0		0	3	1	0	1	0	1	1	1	0			0	0	12	0	0	0	0	0	0	1	180	83	25.6173	0	12	1	1	1	1	0					1	0	0	0
30	A	男	84	0	0	283	130	0		0	4	1	0	0	0	1	1	3	0			1	1	1	0	0	0	0	0	1	1	150.4	44.6	19.7169	0	50	1	0	1	0	0	0	0	1	1	1	0	0	0
31	A	男	63	0	0	254	102	0		0	3	1	0	1	0	1	1	1	0			0	0	12	0	0	0	0	0	0	0	177	76.5	24.4183	0	12	1	0	0	1	0	1	1	1	0	1	0	0	0
32	A	女	70	0	1	208		0		0	2	1	0	0	0	1	1	1	1	2	10	0	0	53	0	0	0	0	0	0	1	149.3	57.6	25.8406	0	53	1	0	0	1	0	1	1	0	0	0	0	0	0
33	A	男	63	0	0	307	125	0		0	4	1	0	1	0	1	1	2	1	2	10	0	0	50	0	0	0	0	0	0	1	169	70.4	24.649	0	50	1	1	1	1	0	0	0	0	1	0	0	0	0
34	A	男	65	0	0	229	92	0		0	1	0	0	0	0	1	1	1	0			0	0	37	0	0	0	0	0	0	0	161.8	62.9	24.0267	0	37	1	1	1	1	1			0		0	0	0	0
35	A	男	64	0	0	334	144	0		0	2	1	0	0	0	1	1	1	0			0	0	45	0	0	0	0	0	0	0	169	60	21.0077	0	45	1	1	0	1	0	0	0	1	1	0	0	0	0
36	A	男	48	0	0	302	150	0		0	3	1	0	1	0	1	1	1	0			0	0	2	0	0	0	0	0	0	1	173	66	22.0522	0	2	1	1	0	0	0	0	0	1	1	0	0	0	0
37	A	男	64	1	0	466	232	1	153	0	3	1	1	0	0	1	1	1	0			0	0	19	0	0	0	0	0	0	1	161	64	24.6904	0	19	1	1	1	1	0	1	母AP	0	1	0	0	0	1
38	A	男	53	0	0	218	81	0		0	2	1	0	0	0	1	1	1	0			1	1	9	0	0	0	0	0	1	0	163	62	23.3355	0	44	1	0	0	1	0	0	0	0	1	0	0	0	0
39	A	男	61	0	0	266	85	0		0	2	1	0	0	0	1	1	1	0			0	0	1	0	0	0	0	0	0	1	178	90	28.4055	0	1	1	1	1	1	1	0	0	0	0	0	0	1	1
40	A	男	79	0	1	143	0	0		0	1	0	0	0	0	1	1	1	0			0	0	33	0	0	0	0	0	0	1	154	61	25.721	0	33	1	0	1	0	0	0	0	0	1	1	0	0	0
41	A	男	69	0	0	241	92	0		0	2	1	0	0	0	1	1	1	0			0	0	82	0	0	0	0	0	0	0	156	49	20.1348	0	82	0	1	1	1	0	0	0	0	1	0	0	0	0
42	A	男	66	0	0	269	115	0		0	2	0	0	0	0	1	1	1	0			0	0	42	0	0	0	0	0	0	1	157	77	31.2386	1	42	1	1	1	1	0	0	0	0	1	1	0	0	0
43	A	男	64	0	0	436	213	0		0	5	1	0	1	0	1	1	1	0			1	1	1	0	0	0	0	0	0	1	157	42	17.0392	0	92	1	0	1	1	0	0	0	0	0	0	0	0	0
44	A	男	58	0	0	414	252	1	82	0	3	1	0	1	0	1	1	1	0			0	0	1	0	0	0	0	0	0	1	164	47	17.4747	0	1	1	0	1	0	0	0	0	0	1	0	0	0	0
45	A	男	73	0	0	286	120	0		0	3	1	0	1	0	1	1	1	1	1	1	0	0	1	0	0	0	0	0	0	1	162.5	73.4	27.7964	0	1	1	1	1	1	0			0	1	0	1	0	0
46	A	男	50	0	0	229	103	0		0	4	1	0	1	0	1	1	1	1	2	2	0	0	1	0	0	0	0	1	0	0	183	88.6	26.4564	0	1	1	1	0	0	0			1	1	0	0	0	0
47	A	女	75	0	0	250	133	0		0	5	1	0	1	0	1	1	2	0			1	1	1	0	0	0	0	0	0	1	154.6	46.5	19.4551	0	1	0	1	0	1	0	1	1	0	0	0	0	0	0
48	A	男	68	0	0	173	59	0		0	2	1	0	0	0	1	1	1	0			0	0	1	0	0	0	0	0	0	1	163	67	25.2174	0	1	0	0	1	0	0	0	0	0	0	0	0	0	0
49	A	男	69	0	1	221	109	0		0	5	1	0	0	0	1	1	3	1	1	1	0	0	2	0	0	0	0	0	0	1	164	63	23.4236	0	2	1	1	1	1	0					1	0	0	0
50	A	女	67	0	1	205		0		0	4	1	0	0	0	1	1	3	1	2	2	0	0	2	0	0	0	0	0	0	1	157.5	57.6	23.22	0	2	0	1	1	1	0					0	0	0	0
51	A	男	68	0	0	246	110	0		0	2	1	0	0	0	1	1	1	1	1	1	0	0	2	0	0	0	0	0	0	1	157	61.15	24.8083	0	2	0	0	1	1	0			0		1	0	1	1
52	A	男	58	0	0	303	162	0		0	4	1	0	1	0	1	1	1	0			0	0	2	0	0	0	0	0	0	0	171	87.6	29.9579	0	2	1	1	1	1	0	1	1	1	1	0	0	0	0
53	A	男	51	0	0	253	107	0		0	4	1	0	0	0	1	1	1	0			0	0	3	0	0	0	0	0	0	1	166.5	80.4	29.002	0	3	1	1	1	0	0			1		0	0	0	0
54	A	男	52	0	0	220	104	0		0	3	1	0	1	0	1	1	1	1	1	1	0	0	3	0	0	0	0	0	1	0	179	73.35	22.8925	0	3	0	1	1	0	0	1	1	0	1	1	0	0	0
55	A	女	72	0	0	167	80	0		0	3	1	0	0	0	1	1	2	1	1	1	0	0	3	0	0	0	0	0	0	0	148.8	45.8	20.6852	0	3	0	1	1	1	0			0		0	0	0	0
56	A	男	63	0	1	174		0		0	3	1	0	0	0	1	1	2	1	1	1	1	1	0.5	0	0	0	0	0	0	0	179.5	84	26.0706	0	4	0	1	1	1	0			0	1	0	0	0	0
57	A	女	82	0	0	216	96	0		0	3	1	0	0	0	1	2	2	0			0	0	4	0	0	0	0	0	0	1	148	72.6	33.1446	1	4	0	1	1	1	0	1	1	0	0	0	0	0	0
58	A	男	66	0	1	180		0		0	2	1	0	0	0	1	1	1	1	1	1	0	0	4	0	0	0	0	0	0	0	174.7	63.8	20.9043	0	4	0	1	1	0	0			0	1	0	0	0	0
59	A	男	70	0	0	175	85	0		0	2	1	0	0	0	1	1	2	1	1	1	0	0	4	0	0	0	0	0	0	1	168.7	52.4	18.412	0	4	0	0	1	1	1	0	0	0	1	0	0	1	1
60	A	男	80	0	0	276	125	0		0	3	1	0	0	0	1	1	2	1	1	1	0	0	4	0	0	0	1	0	0	1	159.6	67	26.3032	0	4	1	1	1	0	0			0	0	0	0	0	0
61	A	男	81	0	0	196	72	0		0	3	1	0	0	0	1	1	2	0			0	0	5	0	0	0	0	0	0	1		42.3		0	5	1	1	1	1	0	0	0	0	0	0	0	0	0
62	A	男	69	0	0	176	75	0		0	3	1	0	1	0	1	1	1	1	2	2	0	0	5	0	0	0	0	0	0	1	164.2	60.4	22.4022	0	5	1	1	1	0	0	0	0	0	1	0	0	0	0
63	A	男	68	1	0	285	151	1	26	0	3	1	0	0	0	1	1	2	1	1	1	0	0	5	0	0	0	0	0	0	1	163.5	74.4	27.8316	0	5	0	0	1	0	0			0	1	0	0	0	0
64	A	男	52	0	0	179	130	0		0	5	1	0	1	0	1	1	2	1	2	2	0	0	6	0	0	0	1	0	0	1	165	86	31.5886	1	6	1	1	1	0	0	0	0	0	1	0	0	0	0
65	A	男	65	0	1	177		0		0	3	1	0	0	0	1	1	2	1	1	1	0	0	6	0	0	0	0	0	0	1	168	90	31.8878	1	6	1	1	1	0	0			0	1		0	0	0
66	A	男	66	0	0	253	130	0		0	4	1	0	1	0	1	1	2	1	2	2	1	1	0.5	0	0	0	0	0	0	0	168	68.8	24.3764	0	7	1	1	1	0	0	0	0	0	1	0	0	0	0
67	A	男	69	0	1	154		0		0	2	1	0	0	0	1	1	1	1	2	2	0	0	7	0	0	0	0	0	0	0	163	65.1	24.5022	0	7	0	1	1	0	0	0	0	0		0	0	0	0
68	A	男	59	0	1	152		0		0	3	1	0	0	0	1	1	2	1	1	1	0	0	8	0	0	0	0	0	0	0	171	70	23.939	0	8	1	1	0	0	0	0	0	0	0	0	0	0	0
69	A	女	66	0	0	245	96	0		0	3	1	0	0	0	1	1	2	1	2	2	0	0	8	0	0	0	0	0	0	1	149.3	64.2	28.8015	0	8	1	1	1	1	1			0	0	1	0	0	0
70	A	男	75	0	0	226	94	0		0	3	1	0	0	0	1	1	2	0			0	0	9	0	0	0	0	0	0	1	157.3	58.8	23.764	0	9	0	1	1	0	0			0	1	1	0	0	0
71	A	男	74	0	0	246	132	0		0	4	1	0	0	0	1	1	3	1	1	13	0	0	9	0	0	0	0	0	0	1	159.3	60.1	23.6833	0	9	1	1	1	1	0			0	1	0	0	0	0
72	A	女	74	0	0	261	125	0		0	4	1	0	0	0	1	1	3	0			1	1	0.5	0	0	0	0	0	0	1	152.9	71.1	30.4127	1	10	1	1	1	0	0			0	1	0	0	0	0
73	A	男	61	0	0	190	81	0		0	3	1	0	0	0	1	1	2	0			0	0	10	0	0	0	0	0	0	1	170	72.1	24.9481	0	10	0	1	1	0	0			0	1	0	0	0	0
74	A	男	66	0	0	227	113	0		0	5	1	0	0	0	1	1	4	1	2	2	0	0	10	0	0	0	0	0	0	0	170.5	75.4	25.9372	0	10	0	0	0	0	0			0	1	0	0	0	0
75	A	男	69	0	1	158		0		0	3	1	0	0	0	1	1	2	1	2	2	0	0	11	0	0	0	1	0	0	1	163	66.8	25.1421	0	11	0	1	0	1	0			0	1	0	0	0	1
76	A	男	72	1	0	387	168	1	49	0	3	1	0	0	0	1	1	2	1	1	13	0	0	12	0	0	0	0	0	0	1	158	55.1	22.0718	0	12	0	1	1	0	0			0	1	0	1	0	0
77	A	男	64	0	0	249	118	0		0	3	1	0	0	0	1	1	3	1	2	2	0	0	12	0	0	0	0	0	0	1	165.5	67.4	24.6073	0	12	0	1	1	1	0			1	1	0	0	0	0
78	A	男	72	0	1	164		0		0	2	1	0	0	0	1	1	1	1	2	2	0	0	7	0	0	0	0	0	0	1	161.6	42	16.083	0	7	1	0	0	0	0			0	1	0	0	0	0
79	A	男	51	0	1	180		0		0	3	1	0	0	0	1	1	2	0			0	0	13	0	0	0	0	1	0	1	167.5	57.5	20.4945	0	13	0	0	0	0	0			0	1	0	0	0	0
80	A	男	76	0	0	201	77	0		0	3	1	0	0	0	1	1	2	1	2	3	0	0	15	0	0	0	0	0	0	1	163.5	53.7	20.0881	0	15	0	0	0	1	0			0	1	0	1	0	0
81	A	男	75	0	1	266	113	0		0	3	1	0	1	0	1	1	1	1	1	4	0	0	16	0	0	0	0	0	0	0	163.7	57.4	21.4198	0	16	1	1	1	1	0			0	1	0	0	0	0
82	A	男	72	0	1	156		0		0	2	1	0	0	0	1	1	1	1	1	4	0	0	1	0	0	0	0	0	0	0	155	57.9	24.0999	0	1	1	1	1	0	0	1	母	0	1	0	0	0	0
83	A	男	58	0	0	238	107	0		0	3	1	0	0	0	1	1	1	1	1	4	0	0	17	0	0	0	0	0	0	1	178.1	82.8	26.1037	0	17	0	0	1	0	0	0	0	0	1	0	0	1	1
84	A	男	63	0	1	252	104	0		0	3	1	0	0	0	1	1	1	1	1	4	0	0	17	0	0	0	0	0	0	1	157.5	61.1	24.6309	0	17	0	1	1	0	0	1	兄	0	1	0	0	0	0
85	A	男	66	0	1	226	103	0		0	4	1	1	0	0	1	1	1	1	2	3	0	0	18	0	0	0	0	0	0	0	168.6	80.3	28.2488	0	18	0	1	1	1	1	0	0	0	1	0	1	0	0
86	A	男	49	0	1	179		0		0	2	1	0	0	0	1	1	1	1	1	4	0	0	18	0	0	0	1	0	0	0	158.5	72.4	28.8191	0	18	0	0	1	0	0	1	父	0	0	1	0	0	0
87	A	男	68	0	1	249	148	0		0	4	1	0	1	0	1	1	1	1	2	3	1	1	0.5	0	0	0	0	0	0	1	156.8	57.2	23.265	0	20	0	1	1	1	0	0	0	0	1	0	0	0	0
88	A	男	78	0	1	223	101	0		0	3	1	0	1	0	1	1	1	1	2	3	0	0	20	0	0	0	0	0	0	1	142.7	44	21.6075	0	20	1	1	1	0	0	0	0	0	0	0	0	0	0
89	A	女	74	0	1	289	123	0		0	6	1	0	0	0	1	1	2	1	2	3	0	0	21	0	0	0	0	0	0	1	158.5	56.1	22.3308	0	21	1	1	1	1	0	0	0	0	0	0	0	0	0
90	A	男	50	0	0	265	134	0		0	4	1	0	1	0	1	1	1	1	2	3	0	0	23	0	0	0	0	0	0	0	174	68.6	22.6582	0	23	1	1	1	0	0	1	母、姉	0	1	0	0	0	0
91	A	男	57	0	1	215		0		0	4	1	0	1	0	1	1	1	1	2	3	0	0	23	0	0	0	0	0	0	0	170.6	77	26.4565	0	23	0	1	0	0	0	0	0	0	1	0	0	0	0
92	A	男	72	0	1	205		0		0	3	1	0	1	0	1	1	1	1	2	3	0	0	23	0	0	0	0	0	0	1	163	61.4	23.1096	0	23	0	1	1	0	0	0	0	1	1	0	0	0	0
93	A	男	66	0	1	252		0		0	3	1	0	1	0	1	1	1	0			0	0	24	0	0	0	0	0	0	1	153.5	56.6	24.0215	0	24	1	1	1	0	0	0	0	0	1	0	1	0	0
94	A	女	75	0	1	205		0		0	3	1	0	1	0	1	1	1	1	1	5	0	0	13	0	0	0	0	0	0	1	154.5	64.6	27.063	0	13	0	1	1	0	0	0	0	0	1	0	0	0	0
95	A	女	65	0	1	255	118	0		0	2	1	0	0	0	1	1	1	1	1	5	0	0	25	0	0	0	0	0	0	1	159.8	51.6	20.2067	0	25	1	1	1	0	0	0	0	0	0	0	1	0	0
96	A	女	64	0	1	144		0		0	2	1	0	0	0	1	1	1	1	1	5	0	0	25	0	0	0	0	0	0	0	157.2	61.65	24.9476	0	25	0	1	1	1	0	0	0	0	1	1	0	0	0
97	A	男	62	0	0	239	109	0		0	4	1	0	1	0	1	1	1	1	1	5	0	0	2	0	0	0	0	1	0	0	170	83.5	28.8927	0	2	1	0	1	1	0	0	0	0		0	0	0	0
98	A	男	78	0	1	170		0		0	2	1	0	0	0	1	1	1	1	2	3	0	0	26	0	0	0	0	0	0	0	160.5	65.7	25.5044	0	26	0	0	0	1	1	1	1	0	1	0	0	0	0
99	A	男	84	0	0	250	92	0		1	2	1	0	0	0	1	1	1	1	1	5	0	0	27	0	0	0	0	0	0	1	167	74.1	26.5696	0	27	0	1	1	0	0	0	0	0	0	0	0	0	0
100	A	女	71	0	1	179		0		0	2	1	0	0	0	1	1	1	1	1	5	0	0	12	0	0	0	0	0	0	1	154	44.1	18.595	0	12	0	0	1	0	0	0	0	0		0	0	1	1
101	A	男	75	0	1	210		0		0	3	1	0	0	0	1	1	1	1	1	5	0	0	27	0	0	0	0	0	0	0	159.5	49.5	19.4574	0	27	0	0	1	1	0	0	0	0	0	0	0	0	0
102	A	女	65	0	1	204		0		0	3	1	0	1	0	1	1	1	1	1	5	0	0	27	0	0	0	0	0	0	1	158	60.1	24.0747	0	27	0	1	1	1	0	1	1	0	0	0	0	0	0
103	A	男	84	0	0	234	111	0		0	3	1	0	0	0	1	1	2	1	1	5	0	0	27	0	0	0	0	0	0	1	157.5	47.1	18.9872	0	27	0	0	0	0	0	0	0	0	1	0	0	0	0
104	A	女	81	0	1	173		0		0	2	1	0	0	0	1	1	1	1	1	5	0	0	30	0	0	0	0	0	0	1	146.5	35.4	16.4941	0	30	0	0	1	0	0	0	0	0	0	0	0	0	0
105	A	男	85	0	1	217		0		0	3	1	0	0	0	1	2	2	1	2	3	0	0	32	0	0	0	0	0	0	1	158.5	57.2	22.7687	0	32	0	0	1	0	0	0	0	0	1	1	0	0	0
106	A	男	67	0	0	303	171	0		0	4	1	0	0	0	1	1	1	1	2	3	0	0	1	0	0	0	0	0	0	0	168.5	72.8	25.6408	0	1	0	1	1	1	0	0	0	0	1	1	0	0	0
107	A	男	74	0	0	263	109	0		0	3	1	0	1	0	1	1	1	1	2	3	0	0	7	0	0	0	0	0	0	1	159.9	68.45	26.7717	0	7	0	1	1	1	0	0	0	0	1	0	1	0	0
108	A	女	64	0	0	268	105	0		0	3	1	0	0	0	1	1	2	0			0	0	33	0	0	0	0	0	0	1	150	63.7	28.3111	0	33	0	0	0	1	0	0	0	0	0	0	0	0	1
109	A	男	68	0	1	195		0		0	3	1	0	0	0	1	1	2	1	1	5	0	0	34	0	0	0	0	0	0	0	161.2	68	26.1685	0	34	1	0	1	0	0	0	0	0	1	0	0	0	0
110	A	男	73	0	0	240	115	0		0	4	1	0	1	0	1	1	1	1	2	3	0	0	4	0	0	0	0	0	0	1	155	42.3	17.6067	0	4	0	0	1	0	0	0	0	0		0	0	0	0
111	A	男	76	0	1	202		0		0	3	0	0	1	0	1	1	1	1	1	5	0	0	4	1	0	0	0	0	0	0	152.7	54	23.1588	0	4	0	1	1	0	0	0	0	0	0	0	0	0	0
112	A	男	74	0	0	255	118	0		0	3	1	0	1	0	1	1	1	1	2	3	0	0	36	0	0	0	0	0	0	1	166.1	69.85	25.3179	0	36	0	0	1	0	0	0	0	0	0	0	0	0	1
113	A	男	89	0	0	284	102	0		0	3	1	0	0	0	1	1	2	0			0	0	2	0	0	0	0	0	0	1	164	69.4	25.8031	0	2	0	0	0	1		0	0	0	1	0	0	0	0
114	A	女	69	0	0	294	69	0		0	2	1	0	0	0	1	1	1	1	1	11	0	0	39	0	0	0	0	0	0	1	150	51.6	22.9333	0	39	0	1	1	1	1	0	0	0	1	0	1	0	1
115	A	男	77	0	1	214		0		0	3	1	0	1	0	1	1	1	1	2	3	0	0	1	0	0	0	0	0	0	1	158	43.5	17.4251	0	1	1	0	1	0	0	0	0	0		0	0	0	0
116	A	男	76	0	1	166		0		0	2	1	0	0	0	1	1	1	1	2	3	0	0	39	0	0	0	0	0	0	0	145	49.35	23.4721	0	39	0	1	1	0	0	0	0	0	1	0	0	0	0
117	A	男	80	0	1	259		0		0	4	1	0	0	0	1	1	3	1	2	3	0	0	39	0	0	0	0	0	0	1	163	66.15	24.8974	0	39	0	0	1	0	0	0	0	0	0	0	0	0	0
118	A	男	59	0	1	328		0		0	3	1	0	1	0	1	1	1	1	2	3	1	1	0.5	0	0	0	0	0	0	1	162	54.1	20.6142	0	32	1	0	0	0	0	0	0	1	1	0	1	0	0
119	A	女	78	0	1	220		0		0	4	1	0	1	0	1	1	1	0			0	0	27	0	0	0	1	0	1	1	144.7	43.6	20.8233	0	27	0	0	1	0	0	0	0	0	0	0	0	0	0
120	A	男	59	0	0	270	123	0		0	4	1	0	0	0	1	1	3	1	2	3	0	0	41	0	0	0	0	0	0	1	166.6	54.5	19.6357	0	41	1	1	1	1	1	0	0	0	1	0	0	0	0
121	A	男	64	0	1	274		0		0	4	1	0	1	0	1	1	1	1	2	3	0	0	42	0	0	0	0	0	0	1	166	76	27.5802	0	42	0	1	0	1	0	0	0	0	1	0	0	0	0
122	A	男	72	0	1	249		0		0	3	1	0	1	0	1	1	1	1	1	11	0	0	42	0	0	0	0	0	0	1	168	59.6	21.1168	0	42	1	1	1	1	1	0	0	0	0	0	1	0	0
123	A	男	72	0	1	273		0		0	2	0	0	1	0	1	1	1	1	2	3	1	1	0.5	0	0	0	0	0	0	1	159.1	52.1	20.5825	0	42	1	0	1	0	0	0	0	0	0	0	1	0	0
124	A	男	74	0	1	267		0		0	4	1	0	0	0	1	1	2	1	1	11	0	0	43	0	0	0	0	0	0	0	166	64.4	23.3706	0	43	0	0	1	0	0	0	0	1	0	0	0	0	0
125	A	男	77	0	1	200		0		0	3	1	0	1	0	1	1	1	1	2	10	0	0	45	0	0	0	0	0	0	1	166.4	87.9	31.7455	1	45	0	0	1	1	0	0	0	0	1	0	0	0	0
126	A	男	64	0	0	251	121	0		0	4	1	0	1	0	1	1	2	1	2	10	0	0	4	0	0	0	0	0	0	1	166.8	69.4	24.9441	0	4	0	1	1	1	0	0	0	0	1	0	0	0	0
127	A	男	44	0	0	275	120	0		0	4	1	0	0	0	1	1	2	0			0	0	28	0	0	0	0	0	0	1	177.1	74.6	23.7849	0	28	0	0	0	1	1	0	0	0		0	0	1	1
128	A	女	41	0	0	250	124	0		0	3	1	0	0	0	1	1	2	1	2	10	0	0	11	0	0	0	0	0	0	1	160	57	22.2656	0	11	1	0	0	1	1	1	父	0	1	0	0	0	0
129	A	男	61	0	0	351	160	0		0	5	1	1	1	0	1	1	2	1	2	10	0	0	1	0	0	0	0	0	0	0	165.1	79.1	29.019	0	1	1	0	0	0	0	0	0	0		0	0	0	0
130	A	男	54	0	1	266		0		0	2	1	0	0	0	1	1	1	1	1	11	0	0	5	0	0	0	0	0	0	0	167.8	72.7	25.8197	0	5	0	1	1	0	0	0	0	0	1	0	0	0	0
131	A	男	50	0	0	222	84	0		0	2	1	0	0	0	1	1	1	0			0	0	48	0	0	0	0	0	0	1	163	63.6	23.9377	0	48	1	0	1	1	1					1	0	1	1
132	A	男	74	0	0	228	92	0		0	3	1	0	1	0	1	1	1	1	2	10	0	0	1	0	0	0	0	0	0	1	153.2	54.7	23.3061	0	1	0	0	1	1	0	0	0	0	1	0	0	0	0
133	A	男	77	0	0	314	160	0		0	3	1	0	1	0	1	1	1	1	1	8	0	0	48	0	0	0	0	0	0	1	149.8	46.3	20.6328	0	48	1	1	1	0	0	0	0	0	1	1	0	0	0
134	A	男	89	0	1	299	33	0		1	2	1	0	0	0	1	1	1	1	1	8	0	0	51	0	0	0	0	0	0	1	163	57.6	21.6794	0	51	0	0	0	0	0	0	0	0	1	0	0	0	0
135	A	男	79	0	0	587	220	0		0	3	1	0	1	0	1	1	1	0			0	0	1	0	0	0	0	0	0	1	155	69.5	28.9282	0	1	0	0	1	0	0	0	0	0	1	0	0	0	0
136	A	女	84	0	0	264	93	0		0	3	1	0	0	0	1	1	2	1	1	8	0	0	24	0	0	0	0	0	0	1	132	45	25.8264	0	24	0	1	1	0	0	0	0	0	0	0	0	0	0
137	A	男	75	0	1	232		0		0	3	1	0	1	0	1	1	1	1	2	10	0	0	51	0	0	0	0	0	0	1	163.5	68	25.4374	0	51	1	1	1	1	0	0	0	0	1	0	0	0	0
138	A	男	73	0	1	254		0		0	3	1	0	1	0	1	1	1	1	2	10	1	1	0.5	0	0	0	0	0	0	0	165.2	60	21.9852	0	39	0	1	1	0	0	0	0	0	0	1	0	0	0
139	A	男	84	0	1	274		0		0	4	1	0	0	0	1	1	3	1	2	10	1	1	0.5	0	0	0	0	0	0	0	161	58.7	22.6457	0	12	0	0	0	1	0	0	0	0	0	0	0	0	0
140	A	男	74	0	1	252		0		0	5	1	0	0	0	1	2	4	1	2	10	1	1	0.5	0	0	0	0	0	0	1	152	47	20.3428	0	7	0	1	1	1	0	0	0	0	1	0	0	0	0
141	A	男	69	0	1	242		0		0	3	1	0	1	0	1	1	1	0			0	0	4	0	0	0	0	0	0	1	161.6	53.05	20.3143	0	4	1	0	0	0	0	0	0	0	1	0	0	0	0
142	A	男	46	0	1	221		0		0	3	1	0	0	0	1	1	2	1	2	10	0	0	1	0	0	0	0	0	0	1	163.7	76.4	28.5099	0	1	0	1	1	1	1	0	0	0	1	1	0	1	1
143	A	男	76	0	1	310		0		0	2	0	1	0	0	1	1	1	1	1	8	0	0	53	0	0	0	0	0	0	0	160.6	60.3	23.379	0	53	1	1	1	1	0	0	0	0	0	0	0	0	0
144	A	男	65	0	1	244		0		0	3	1	0	1	0	1	1	1	1	2	10	0	0	53	0	0	0	0	0	0	0	172.5	75.8	25.4736	0	53	0	1	0	1	0	0	0	0	1	0	0	0	0
145	A	男	71	0	1	225		0		0	3	1	0	1	0	1	1	1	1	2	10	0	0	1	0	0	0	0	0	0	0	165.5	71	25.9216	0	1	0	0	1	1	0	0	0	1	1	0	0	0	0
146	A	男	75	0	1	274	117	0		0	3	1	0	1	0	1	1	1	1	2	10	0	0	9	0	0	0	0	0	0	1	150.5	62.6	27.6377	0	9	1	1	1	1	0	1	母	0	1	0	0	0	0
147	A	男	79	0	0	250	109	0		0	3	1	0	0	0	1	1	2	1	2	10	0	0	56	0	0	0	0	0	0	1	165	59.9	22.0018	0	56	1	1	1	0	0	0	0	0	0	0	0	0	0
148	A	男	52	0	1	236		0		0	3	1	0	1	0	1	1	1	0			0	0	1	0	0	0	0	0	0	0	166	67.2	24.3867	0	1	0	1	1	0	0	0	0	0	1	0	0	0	0
149	A	男	77	0	0	340	132	0		0	3	1	0	1	0	1	1	1	0			0	0	30	0	0	0	0	0	0	1	152.2	42.9	18.5194	0	30	1	1	1	1	1	0	0	0	1	0	0	0	0
150	A	男	79	0	0	283	121	0		0	3	1	0	1	0	1	1	2	0			0	0	58	0	0	0	0	0	0	1	162	59	22.4813	0	58	1	1	1	0	0	0	0	0	0	0	0	0	0
151	A	男	56	0	0	514	197	0		0	3	1	0	1	0	1	1	1	0			0	0	1	0	0	0	0	0	0	0	182.2	97.6	29.4004	0	1	1	1	1	1	0	1	父MI	0	1	0	0	0	0
152	A	男	80	0	1	222		0		0	2	1	0	0	0	1	1	1	0			0	0	61	0	0	0	0	0	0	1	153.7	46.3	19.599	0	61	0	0	1	1	1	0	0	0	1	0	0	1	1
153	A	女	69	0	1	210		0		0	1	0	0	0	0	1	1	1	0			0	0	3	0	0	0	0	0	0	1	150.5	49.8	21.9865	0	3	0	1	0	1	1	0	0	0	0	0	0	0	0
154	A	女	85	0	0	407		0		0	3	1	0	1	0	1	1	1	0			0	0	1	0	0	0	0	1	0	1	145.9	51.8	24.3343	0	1	1	1	1	0	0	0	0	0	0	0	0	0	0
155	A	男	77	0	0	377	196	0		0	3	1	0	1	0	1	1	2	1	2	10	0	0	73	1	1	0	0	0	0	1	172	67	22.6474	0	73	1	1	1	0	0	0	0	0	1	0	0	0	0
156	A	男	66	0	0	417	158	0		0	3	1	0	1	0	1	1	1	0			0	0	32	0	0	0	0	0	0	1	174.8	88.7	29.0296	0	32	1	1	1	1	0	0	0	0	1	0	0	0	0
157	A	女	84	0	1	212		0		0	2	1	0	0	0	1	1	1	0			0	0	25	0	0	0	0	0	0	0	148	58	26.4792	0	25	1	1	1	1	0	0	0	0	0	1	0	0	0
158	A	男	63	0	0	300	116	0		0	2	1	0	0	0	1	1	1	0			0	0	45	0	0	0	0	0	0	1	163	77	28.9811	0	45	1	1	1	0	0	0	0	0	0	0	0	0	0
159	A	女	73	0	0	471	220	0		0	3	1	0	1	0	1	1	1	0			0	0	26	0	0	0	0	0	0	1	153	66.4	28.3652	0	26	0	1	1	1	0	0	0	0	0	0	0	0	0
160	A	男	62	0	0	405	149	0		1	3	1	0	1	0	1	1	1	0			0	0	62	0	0	0	0	0	0	1	176	73.2	23.6312	0	62	1	1	1	1	0	0	0	0	1	0	0	0	0
161	A	男	60	0	0	357	143	0		0	3	1	0	1	0	1	1	1	1	1	7	0	0	1	0	0	0	0	0	0	0	170	74	25.6055	0	1	1	1	1	0	0	1	父IHD	0	0	0	0	0	0
162	A	男	60	0	0	347	157	0		0	2	0	0	0	0	1	2	1	1	1	7	0	0	1	0	0	0	0	0	0	1	168	55	19.487	0	1	1	0	1	0	0	0	0	0	1	1	0	1	1
163	A	女	71	0	0	318	178	0		0	2	1	0	1	0	1	1	1	0			1	1	0.5	0	0	0	0	0	0	1	148	42	19.1746	0	66	1	1	1	0	0	1	姉CABG	0	0	0	0	0	0
164	A	男	67	0	1	346		0		0	3	1	0	1	0	1	1	1	1	1	7	0	0	51	0	0	0	0	0	0	0	171	75	25.6489	0	51	1	1	1	1	0	0	0	0	1	0	0	0	1
165	A	男	70	0	1	310		0		0	2	1	0	0	0	1	1	1	1	1	7	0	0	73	0	0	0	1	1	0	1	163	58	21.83	0	73	0	1	1	1	0	0	0	0	1	0	0	0	0
166	A	女	74	0	1	271		0		0	3	1	0	0	0	1	1	2	0			0	0	1	0	0	0	0	1	0	0	156	65	26.7094	0	1	0	1	1	1	0	1	兄甥がCABG	0	0	0	0	0	0
167	A	男	68	0	0	313	129	0		0	3	1	0	1	0	1	1	1	0			0	0	7	0	0	0	0	0	0	0	162	57	21.7193	0	7	0	1	1	0	0	1	兄がCABG	0	1	1	0	0	0
168	A	女	77	0	1	340	118	0		1	3	1	0	1	0	1	1	1	0			0	0	74	0	0	0	0	0	0	1	139	35	18.115	0	74	0	1	1	1	1	0	0	0	0	0	0	0	0
169	A	男	63	0	0	324	150	0		0	2	1	0	0	0	1	1	1	0			0	0	30	0	0	0	0	0	0	1	166	54	19.5965	0	30	1	1	1	1	0	0	0	0	0	0	0	0	1
170	A	女	66	0	0	213	80	0		0	2	1	0	0	0	1	1	1	0			0	0	51	0	0	0	0	0	0	1	156	43	17.6693	0	51	1	0	0	0	0	1	姉CABG	0	1	1	0	0	0
171	A	男	70	0	0	355	187	0		0	3	1	0	1	0	1	1	1	0			0	0	77	0	0	0	0	0	0	0	165	64	23.5078	0	77	0	1	1	1	1	0	0	0	1	0	0	0	0
172	A	女	64	0	0	300	122	0		0	2	1	0	0	0	1	1	1	0			0	0	78	0	0	0	0	0	0	1	148	48	21.9138	0	78	0	1	0	0	0	0	0	0	0	0	0	0	0
173	A	男	68	0	1	194		0		0	2	1	0	0	0	1	1	1	0			0	0	1	0	0	0	0	0	0	1	155	53	22.0604	0	1	1	1	1	1	0	0	0	0	1	0	0	0	0
174	A	男	55	0	0	300	144	0		0	2	1	0	0	0	1	1	1	0			0	0	8	0	0	0	0	1	0	0	172	82	27.7177	0	8	1	1	1	1	0	1	1	0	1	0	0	0	0
175	A	男	82	0	0	565	313	1	120	0	2	1	0	0	0	1	1	1	0			0	0	1	0	0	0	0	0	0	1	154	75	31.6242	1	1	0	0	0	1	1	1	1	0	0	0	0	0	0
176	A	男	75	0	0	428	227	0		0	4	1	0	0	0	1	1	1	0			0	0	82	0	0	0	0	0	0	1	165	33	12.1212	0	82	1	1	0	0	0	0	0	0	1	0	0	0	0
177	A	男	79	0	0	337	177	1	55	0	3	1	0	0	0	1	1	2	0			0	0	21	0	0	0	0	0	0	1	155	53	22.0604	0	21	0	1	1	0	0	0	0	0	1	0	0	0	0
178	A	男	74	0	1	266		0		0	3	1	0	0	0	1	1	2	0			0	0	86	0	0	0	0	0	0	1	165	56	20.5693	0	86	1	1	1	1	0	0	0	1	0	1	1	0	0
179	A	男	75	0	0	298	94	1	36	0	2	1	0	0	0	1	1	1	0	1	14	1	1	0.5	0	0	0	0	0	0	1	158	59	23.634	0	70	1	1	1	1	1	1	1	0	0	0	0	0	1
180	A	男	78	0	0	373	187	0		0	3	1	0	1	0	1	1	1	0			0	0	58	0	0	0	0	0	0	1	161.3	64	24.5986	0	58	1	0	1	0	0	0	0	0	1	1	0	0	0
181	A	男	68	0	0	314	145	0		0	3	1	0	1	0	1	1	1	0			0	0	90	0	0	0	0	0	0	0	166	73	26.4915	0	90	1	1	0	0	0	0	0	0	1	0	1	0	0
182	A	男	55	0	0	417	211	1	110	0	4	1	0	1	0	1	1	2	0			0	0	11	0	0	0	0	0	0	0	177	71	22.6627	0	11	1	1	1	1	0	0	0	0	1	1	0	0	0
183	A	男	67	0	0	344	151	0		0	3	1	0	0	0	1	1	2	0			0	0	4	0	0	0	0	0	0	1	155	45.1	18.7721	0	4	1	0	1	1	0	1	1	1	1	0	0	1	1
184	A	男	79	0	0	301	156	0		0	3	1	0	0	0	1	1	2	0			1	1	0.5	0	0	0	0	0	0	1	151	44	19.2974	0	55	0	1	1	0	0	0	0	0	1	0	0	0	0
185	A	男	66	0	0	336	153	1	114	0	3	1	0	0	0	1	1	2	0			0	0	12	0	0	0	0	0	0	0	171	53	18.1252	0	12	1	1	0	1	0	0	0	0	0	0	0	0	0
186	A	男	56	0	0	317	142	0		0	3	1	0	1	0	1	1	1	0			0	0	94	0	0	0	0	0	0	0	167	93	33.3465	1	94	1	1	0	0	0	1	父DCM	0	1	0	0	0	0
187	A	男	84	0	1	220		0		0	1	0	0	0	0	1	1	1	0			1	1	0.5	0	0	0	0	0	0	0	160	60	23.4375	0	94	0	1	1	1	1	1	弟AMI	0	1	1	0	0	0
188	A	男	60	0	0	328	123	1	70	0	3	1	0	0	0	1	1	2	0			0	0	33	0	0	0	0	0	0	1	160	59	23.0469	0	33	0	0	1	1	1	0	0	0	1	0	1	0	0
189	A	男	61	0	0	299	143	0		0	3	1	0	0	0	1	2	2	0			0	0	64	1	0	0	0	0	0	0	170	82	28.3737	0	64	1	1	1	0	0	1	母CABG	0	0	0	0	0	0
190	A	男	77	0	0	228	91	0		0	2	1	0	0	0	1	1	1	0			0	0	4	0	0	0	0	0	0	1	161	66	25.462	0	4	0	0	1	1	0	0	0	0	0	0	0	0	0
191	A	男	56	0	0	341	147	0		0	3	1	0	1	0	1	1	1	0			0	0	95	0	0	0	0	0	0	1	168	98	34.7222	1	95	1	1	1	1	0			1	1	0	0	0	0
192	A	男	69	0	0	414	261	0		0	3	1	0	1	0	1	1	1	0			0	0	1	0	0	0	0	0	0	1	172	70	23.6614	0	1	1	1	1	0	0	0	0			0	0	0	0
193	A	女	82	0	0	345	192	0		0	4	1	0	1	0	1	1	2	0			0	0	1	0	0	0	0	0	0	1	155	50	20.8117	0	1	1	0	1	0	0	0	0	0	0	0	0	0	0
194	A	男	53	0	0	326	174	0		0	3	1	0	1	0	1	1	1	0			0	0	10	0	0	0	0	0	0	1	168	54	19.1327	0	10	1	1	0	0	0	0	0	0	1	0	0	0	0
195	A	男	74	0	0	365	143	0		0	3	1	0	0	1	1	1	1	0	1	14	0	0	98	0	0	0	0	0	0	1	158	68	27.2392	0	98	1	0	1	0	0			0	1	1	0	0	0
196	A	男	52	0	0	310	146	0		0	3	1	0	0	0	1	2	2	0			0	0	27	0	0	0	0	0	0	1	174	53	17.5056	0	27	1	0	1	1	0					0	1	0	0
197	A	男	72	0	0	257	92	0		0	2	1	0	0	0	1	1	1	0			0	0	87	0	0	0	0	0	0	0	168	71	25.1559	0	87	0	0	1	0	0			1	1	0	0	0	0
198	A	男	60	0	1	324		0		0	3	1	0	1	0	1	1	1	0			0	0	85	0	0	0	0	0	0	1	162	85	32.3884	1	85	1	1	1	0	0			1	1	0	0	0	0
199	A	男	74	0	0	331	174	1	86	0	3	1	0	1	0	1	1	1	0			0	0	31	0	0	0	0	0	0	1	163	65	24.4646	0	31	1	1	1	0	0					0	0	0	0
200	A	男	72	0	0	678	101	0		0	2	1	0	0	0	1	1	1	0	1	14	0	0	101	0	0	0	0	0	0	1	164	52	19.3337	0	101	0	1	1	0	0			0	1	0	1	0	0
201	A	男	75	0	1	389		0		0	3	1	0	0	0	1	1	2	0			0	0	91	0	0	0	0	0	0	1	161	59	22.7615	0	91	0	1	0	0	0	0	0	0	0	0	0	0	0
202	A	男	70	0	1	313		0		0	3	1	0	1	0	1	1	1	0			0	0	16	0	0	0	0	0	0	1	167	68	24.3824	0	16	1	1	1	1	1					0	0	0	0
203	A	女	85	0	1	215		0		0	2	1	0	0	0	1	1	1	0			0	0	30	0	0	0	0	0	0	1	145	36	17.1225	0	30	1	1	1	1	0	0	0	0	0	0	0	0	0
204	A	男	56	0	0	288	133	0		0	3	1	0	1	0	1	1	1	0			0	0	103	0	0	0	0	0	0	1	158	52	20.83	0	103	1	0	0	1	1					0	0	0	0
205	A	男	47	0	0	322	155	0		0	3	1	0	1	0	1	1	1	0			0	0	1	0	0	0	0	0	0	1	176	76	24.5351	0	1	1	1	1	0	0					1	0	0	0
206	A	男	70	0	0	295	151	0		0	2	1	0	0	0	1	1	1	0			0	0	89	0	0	0	0	0	0	0	168	69	24.4473	0	89	1	0	0	0	0					1	0	0	0
207	A	男	71	0	0	293	148	0		0	2	1	0	0	0	1	1	1	0			0	0	19	0	0	0	0	0	0	1	158	58.8	23.5539	0	19	0		1		0	0	0	0	0	0	0	0	0
208	A	男	79	0	0	462	171	1	80	0	3	1	0	1	0	1	1	1	0			0	0	1	0	0	0	0	0	0	1	161	51	19.6752	0	1	0	1	1	0	0					0	0	0	0
209	A	男	79	0	1	290		0		0	2	1	0	0	0	1	1	1	0			0	0	107	0	0	0	0	0	0	0	170	60	20.7612	0	107	0	0	1	0	0					0	1	0	0
210	A	男	76	0	1	537	165	0		0	3	0	1	0	1	1	1	1	0			0	0	1	0	0	0	0	0	0	1	158	64	25.6369	0	1	0	0	1	1	0					1	0	0	0
211	A	男	77	0	1	300		0		0	3	1	0	1	0	1	1	1	0			0	0	108	0	0	0	0	0	0	0	162	45	17.1468	0	108	0	1	1	0	0					0	0	0	0
212	A	男	77	0	0	375	136	0		0	4	1	0	1	0	1	1	2	0			0	0	31	0	0	0	0	0	0	1	172	60	20.2812	0	31	0	1	1	0	0					0	0	0	0
213	A	男	62	0	0	281	102	0		0	2	0	0	1	0	1	1	1	0			0	0	110	0	0	0	0	0	0	0	173	71	23.7228	0	110	1	1	1	0	0	0	0	0	1	0	1	0	1
214	A	女	71	0	1	396	37	0		1	3	1	0	0	0	1	1	2	0			0	0	2	0	0	0	1	0	0	1	144	48	23.1481	0	2	1	0	1	1	0	0	0	0	0	1	0	0	1
215	A	男	76	0	0	365	143	0		0	5	1	0	0	0	1	1	3	0			0	0	110	0	0	0	0	0	0	0	152	53	22.9398	0	110	1	1	1	0	0					1	0	0	0
216	A	男	74	0	0	443	218	0		0	4	1	0	1	0	1	1	1	0			0	0	4	0	0	0	0	0	0	1	151	47	20.6131	0	4	0				0					0	0	0	0
217	A	男	72	0	0	276	116	0		0	3	1	0	0	0	1	1	2	0			0	0	116	0	0	0	0	0	0	0	158	53	21.2306	0	116	1	1	1	1	1						0	0	0
218	A	女	76	0	1	210		0		0	3	1	0	0	0	1	1	2	0			0	0	1	0	0	0	0	0	0	0	143	47	22.984	0	1	1	1	1	1	1					0	0	0	0
219	A	男	54	0	1	270		0		0	2	1	0	0	0	1	1	1	0			0	0	75	0	0	0	0	0	0	1	158	64	25.6369	0	75	1	1	1	0	0					0	0	1	1
220	A	男	71	0	1	293		0		0	3	1	0	1	0	1	1	1	0			0	0	1	0	0	0	0	0	0	1	162	58	22.1003	0	1	0	1	1	1	0					1	0	0	0
221	A	男	79	0	0	292	95	0		0	3	1	0	0	0	1	1	2	0			0	0	56	0	0	0	0	0	0	1	160	38	14.8438	0	56	1	1	1	1	0					0	0	0	0
222	A	男	48	0	1	320		0		0	4	1	0	1	0	1	1	2	0			0	0	116	0	0	0	0	0	0	0	170	76	26.2976	0	116	1	0	1	1	1					0	0	0	0
223	A	男	59	0	1	315		0		0	3	1	0	0	0	1	1	2	0			0	0	1	0	0	0	0	0	0	1	155	78	32.4662	1	1	0	1	1	0	0					1	0	1	1
224	A	男	76	0	1	320		0		0	3	1	0	1	0	1	2	1	0			0	0	117	0	0	0	0	0	0	1	168	58	20.5499	0	117	0	1	1	0	0					0	0	0	0
225	A	男	61	0	0	331	144	0		0	2	0	0	1	0	1	1	1	0			0	0	45	0	0	0	0	0	0	0	170	65	22.4913	0	45	1	1	1	1	0					1	0	0	0
226	A	男	71	0	1	162		0		0	1	0	0	0	0	1	1	0	0			0	0	101	0	0	0	0	0	0	1	150	55	24.4444	0	101	0	1	1	0	0	0	0	0	0	1	0	0	0
227	A	男	74	0	1	467		0		0	4	1	0	0	0	1	1	2	0			0	0	88	0	0	0	0	0	0	1	144	43	20.7369	0	88	1	0	1	0	0			0	0	0	0	0	1
228	A	男	71	0	1	240		0		0	2	1	0	0	0	1	1	1	0			0	0	119	0	0	0	0	0	0	0	158	77	30.8444	1	119	0	1	1	0	0					0	0	0	0
229	A	男	56	0	0	383	191	1	138	0	3	0	0	1	0	1	1	2	0			0	0	102	0	0	0	0	0	0	0	178	63	19.8839	0	102	1	0	0	0	0					0	0	0	0
230	A	男	52	0	1	275	0	0		0	3	1	0	0	0	1	1	2	0			0	0	10	0	0	0	0	0	0	1	164	68	25.2826	0	10	0	1	1	0	0					0	0	1	1
231	A	男	67	0	0	488	215	1	134	0	3	1	0	0	0	1	1	2	0			0	0	1	0	0	0	0	0	0	1	155	50	20.8117	0	1	1	1	1	0	0					0	0	0	0
232	A	女	81	0	0	337	184	1	106	0	3	1	0	0	0	1	1	2	0			0	0	1	0	0	0	0	0	0	1	154	44	18.5529	0	1	1	1	1	0	0					0	0	0	0
233	A	男	73	0	0	436	162	0		0	5	1	0	1	0	1	1	2	0			0	0	2	0	0	0	0	0	0	1	162	54	20.5761	0	2	0	1	1	1	0			0	1	0	0	0	0
234	A	男	68	0	1	348		0		0	3	1	0	0	0	1	1	2	0			1	1	0.5	0	0	0	0	0	0	1	162	62	23.6244	0	122	1	1	1	1	0					0	0	0	0
235	A	男	42	0	1	265		0		0	2	1	0	0	0	1	1	1	0			0	0	1	0	0	0	0	0	0	0	172	61	20.6193	0	1	1	1	1	1	0			1	1	0	1	1	1
236	A	男	64	0	0	265	121	1	70	0	2	1	0	0	0	1	1	1	0			0	0	1	0	0	0	0	0	0	0	161	63	24.3046	0	1	0	1	1	0	0					0	0	0	0
237	A	男	65	0	1	444		0		0	3	1	0	1	0	1	1	1	0			0	0	125	0	0	0	0	0	0	1	171	71	24.281	0	125	1	1	1	1	0			0	1	0	0	0	0
238	A	男	72	0	0	265	92	0		0	2	1	0	0	0	1	1	1	0			0	0	125	0	0	0	0	0	0	0	163	82	30.863	1	125	1	1	1	1	1					0	0	0	1
239	A	男	77	0	0	320	117	1	73	0	2	1	0	0	0	1	1	1	0			0	0	1	0	0	0	0	0	0	1	160	57	22.2656	0	1	0	0	1	1	0					0	0	0	0
240	A	男	77	0	1	272		0		0	2	1	0	0	0	1	1	1	0			0	0	127	0	0	0	0	0	0	0	155	36	14.9844	0	127	1	1	1	1	0			0	1	0	0	0	0
241	A	女	81	0	0	165	94	0		0	2	1	0	0	0	1	1	1	0			0	0	3	0	0	0	0	0	0	1	154	47	19.8178	0	3	1	0	1	0	0					1	0	0	0
242	A	女	71	0	1	378		0		0	3	1	0	1	0	1	1	1	0			0	0	83	0	0	0	0	0	0	1	150	50	22.2222	0	83	0	1	1	1	0					0	0	0	0
243	A	男	77	0	1	306		0		0	3	1	0	1	0	1	1	1	0			0	0	10	0	0	0	0	0	0	1	160	45	17.5781	0	10	1	0	1	0	0					0	0	0	0
244	A	男	65	0	1	333		0		0	2	1	1	0	0	1	1	1	0			0	0	32	0	0	0	0	0	0	1	161	64	24.6904	0	32	0				0					0	0	0	0
245	A	男	78	0	0	323		0		0	2	0	0	0	0	1	1	2	0			1	1	4	0	0	0	0	0	0	1		68			4	1	0	0	0	0					0	0	0	0
246	A	女	78	0	0	300	100	0		0	3	1	0	0	0	1	1	2	0			0	0	119	0	0	0	0	0	0	0	150	55	24.4444	0	119	0	1	1	0	0					0	0	0	0
247	A	男	66	0	0	379	204	1	106	0	3	1	0	1	0	1	1	1	0			0	0	131	0	0	0	0	0	0	1	163	69	25.9701	0	131	1	1	1	1	0					1	1	0	0
248	A	女	76	0	0	385	213	1	81	0	3	1	0	0	0	1	1	2	0			0	0	4	0	0	0	0	0	0	1		56			4	0	0	1	1	1						0	0
249	A	男	58	0	1	246		0		0	2	0	0	0	1	1	1	1	0			0	0	136	0	0	0	0	0	0	0	164	68	25.2826	0	136	1	1	1	0	0					1	0	0	0
250	A	男	77	0	1	219		0		0	2	1	0	0	0	1	1	1	0			0	0	15	0	0	0	0	0	0	1	156	40	16.4366	0	15	1	1	1	1	0					1	0	0	1
251	A	男	67	0	1	192		0		0	1	0	0	0	0	1	1	1	0			0	0	129	0	0	0	0	0	0	0	157	56	22.719	0	129	1	1	1	1	0					0	1	0	0
252	A	女	80	0	1	418		0		0	3	1	0	0	1	1	1	1	0			0	0	100	0	0	0	0	0	0	1	148	54	24.653	0	100	1	0	0	0	0					1	0	0	0
253	A	男	74	0	1	280		0		0	2	1	0	0	0	1	1	1	0			0	0	103	0	0	0	0	0	0	0	160	55	21.4844	0	103	1	1	1	0	0					0	0	0	1
254	A	男	77	0	1	333		0		0	4	1	0	0	0	1	1	3	0			0	0	60	0	0	0	0	0	0	1	158	48	19.2277	0	60	1	0	1	1	0					1	1	0	0
255	A	男	76	0	1	237		0		0	2	1	0	0	0	1	1	1	0			0	0	138	0	0	0	0	0	0	0	155	68	28.3039	0	138	1	1	1	1	1					0	0	0	0
256	A	女	56	0	1	249		0		0	2	1	0	0	0	1	1	1	0			0	0	139	0	0	0	0	0	0	0	155	67	27.8876	0	139	0	0	1	1	1					0	0	0	0
257	A	男	71	0	1	314		0		0	2	1	0	0	0	1	1	1	0			0	0		0	0	0	0	0	0	1						1		1	1						0	0	0	1
258	A	男	79	0	0	310	152	0		0	2	1	0	0	0	1	2	2	0			0	0	91	0	0	0	0	0	0	1	153	39	16.6603	0	91	0	0	0	1	0					0	0	0	0
259	A	男	68	0	0	349	133	0		0	3	1	0	1	0	1	1	1	0			0	0	59	0	0	0	0	0	0	1	160	54	21.0938	0	59	0	0	1	0	0					0	0	0	0
260	A	男	69	1	1	484	296	1	200	0	4	1	1	0	0	1	1	2	0	1	15	0	0	52	0	0	0	0	0	0	1	173	52	17.3745	0	52				1	1							0
261	A	女	70	0	1	262		0		0	2	1	0	0	0	1	1	1	0			0	0	145	0	0	0	0	0	0	0	153	46	19.6506	0	145	1	0	1	1	0					0	0	0	0
262	A	女	81	1	0	324	188	1	71	0	4	1	0	0	0	1	2	3	0			0	0	1	0	0	0	0	0	0	1	149	54	24.3232	0	1	0	1	1	0	0	0	0	0	0	0	0	0	0
263	A	男	69	1	0	338	201	1	71	0	3	1	0	0	0	1	1	2	1	1	1	0	0	1	0	0	0	1	0	0	1	168	66	23.3844	0	1	0	1	1	1	1	0	0	0	1	0	0	0	0
264	A	男	68	1	0	316	191	1	49	0	5	1	0	1	0	1	1	2	1	1	1	0	0	3	0	0	0	0	0	0	1	156	57	23.4221	0	3	0	1	0	1	0			0	0	0	0	0	0
265	A	男	62	1	0	316	180	1	82	0	2	1	0	0	0	1	1	1	1	1	1	0	0	4	0	0	0	0	0	0	1	161	70	27.0051	0	4	0	1	1	1	0	0	0	0	1	0	0	1	1
266	A	男	77	1	0	267	155	1	60	0	2	1	0	0	0	1	1	1	1	1	1	0	0	5	0	0	0	0	0	0	1	167	52	18.6453	0	5	0	0	1	0	0	0	0	0	0	0	0	0	0
267	A	男	75	1	0	360	198	1	69	0	4	1	0	0	0	1	2	3	0			0	0	9	0	0	0	0	0	0	1	164	68	25.2826	0	9	0	1	1	1	0	0	0	0	1	0	0	0	0
268	A	女	70	1	0	311	172	1	65	0	2	1	0	0	0	1	1	1	1	1	1	0	0	9	0	0	0	0	0	0	1	150	50	22.2222	0	9	0	0	1	0	0	0	0	0	0	0	0	0	0
269	A	男	60	1	0	374	217	1	41	0	5	1	0	0	0	1	2	4	0			0	0	10	1	1	0	0	0	0	1	175	83	27.102	0	10	1	0	1	0	0	0	0			0	0	0	0
270	A	男	73	1	0	331	196	1	77	0	2	0	0	0	0	1	2	2	0			0	0	1	0	0	0	0	0	0	1	171	69	23.597	0	1	1	1	0	1	0	0	0	1	0	1	0	0	0
271	A	男	66	1	0	316	157	1	50	0	2	1	0	0	0	1	1	1	1	1	1	0	0	6	0	0	0	0	0	0	1	162	73	27.8159	0	6	0	1	1	0	0			1	1	0	0	0	0
272	A	女	63	1	0	415	243	1	71	0	3	1	0	0	0	1	1	2	1	2	2	0	0	12	0	0	0	0	0	0	1	157	70	28.3987	0	12	1	0	1	1	0					0	0	0	0
273	A	女	78	1	0	389	236	1	57	0	2	1	0	0	0	1	1	1	0			0	0	14	0	0	0	0	0	0	1	135	39	21.3992	0	14	1	0	1	0	0					0	0	1	1
274	A	男	82	1	0	290	126	1	64	0	2	1	0	0	0	1	1	1	0			0	0	15	0	0	0	0	0	0	1	153	70	29.903	0	15	0	1	1	0	0			0	1	0	0	0	0
275	A	女	81	1	0	340	202	1	33	0	3	1	0	0	0	1	2	2	0			0	0	21	0	0	0	0	0	0	1	163	53	19.9481	0	21	1	1	0	1	0					0	0	0	0
276	A	女	76	1	0	220	128	1	55	0	1	0	0	0	0	1	1	1	1	2	3	0	0	22	0	0	0	0	0	0	1	146	50	23.4566	0	22	0	1	0	0	0			0	0	0	0	0	0
277	A	男	63	1	0	390	222	1	85	0	3	1	0	0	0	1	1	3	1	1	5	0	0	24	0	0	0	0	0	0	1	168	86	30.4705	1	24	0	1	1	1	0	1	父AMI	0	1	0	0	0	0
278	A	男	62	1	0	347	197	1	98	0	3	1	0	0	0	1	1	2	1	1	5	0	0	25	0	0	0	0	0	0	1	162	68	25.9107	0	25	1	1	1	1	0	0				1	0	0	1
279	A	女	76	1	0	296	168	1	68	0	2	1	0	0	0	1	1	1	1	1	5	0	0	27	0	0	0	0	0	0	1	151	56	24.5603	0	27	1	1	1	0	0	0	0	0	0	0	0	0	0
280	A	男	69	1	0	343	198	1	35	0	4	1	0	1	0	1	1	1	0			0	0	29	0	0	0	0	0	0	1	169	54	18.9069	0	29	1	1	1	1	0	0	0	1	0	0	0	0	0
281	A	男	58	1	0	449	294	1	74	0	4	1	0	1	0	1	1	2	1	2	3	0	0	30	0	0	0	0	0	0	1	172	80	27.0416	0	30	1	1	1	0	0	1	1	0	1	0	0	0	0
282	A	男	79	1	0	445	202	1	97	0	2	1	0	0	0	1	1	1	1	2	3	0	0	32	0	0	0	0	0	0	1	151	50	21.9289	0	32	0	1	1	1	0	0	0	0	1	0	0	0	0
283	A	男	79	1	0	314	179	1	90	0	2	1	0	0	0	1	1	1	1	1	5	0	0	34	0	0	0	0	0	0	1	157	62	25.1532	0	34	1	1	1	0	0	0	0	0	1	1	0	0	0
284	A	男	57	1	0	471	245	1	168	0	1	0	0	0	0	1	1	1	0			0	0	31	0	0	0	0	0	0	1	174	80	26.4236	0	31	0	1	1	0	0	0	0	0	1	0	0	0	0
285	A	男	75	1	0	369	192	1	78	0	3	1	0	0	0	1	1	2	1	2	3	0	0	36	0	0	0	0	0	0	1	167	55	19.721	0	36	0	1	1	1	0	0	0	0	1	0	1	0	0
286	A	男	62	1	0	330	188	1	54	0	3	1	0	1	0	1	1	1	1	2	3	0	0	37	0	0	0	0	0	0	1	163	42	15.8079	0	37	0	0	0	0	0					0	0	0	0
287	A	男	79	1	0	327	159	1	82	0	2	1	0	0	0	1	1	1	1	1	11	0	0	41	0	0	0	0	0	0	1	167	87	31.1951	1	41	1	1	1	1	0	1	長女	0	1	0	0	0	0
288	A	男	67	1	0	321	144	1	105	0	2	1	0	0	0	1	1	1	1	1	11	0	0	46	0	0	0	0	0	0	1	167	62	22.231	0	46	0	1	1	0	0			0	1	0	0	0	0
289	A	女	84	1	0	375	198	1	103	0	1	0	0	0	0	1	1	1	1	2	10	0	0	31	0	0	0	0	0	0	1	148	44	20.0877	0	31	0	1	1	0	0	1	弟弁置換	0	0	0	0	0	0
290	A	男	64	1	0	444	247	1	104	0	2	0	0	0	0	1	1	2	1	2	10	0	0	52	0	0	0	0	0	0	1	166	74	26.8544	0	52	0	1	1	0	0	1	母	0	1	0	0	0	0
291	A	男	78	1	0	361	192	1	66	0	1	0	0	0	0	1	1	1	1	2	10	0	0	64	0	0	0	0	0	0	1	149	30	13.5129	0	64	1	0	1	0	0	0	0	0	0	0	0	0	0
292	A	男	77	1	0	343	151	1	70	0	2	1	0	0	0	1	1	1	1	2	10	0	0	12	0	0	0	0	0	0	1	165	61	22.4059	0	12	1	1	1	1	0	0	0	1	1	0	0	1	1
293	A	男	62	1	0	486	251	1	94	0	2	0	0	1	0	1	1	1	1	2	10	0	0	71	0	0	0	0	0	0	1	172	71	23.9995	0	71	1	0	0	1	0	0	0	0	1	1	0	0	0
294	A	男	79	1	0	376	197	1	53	0	2	0	0	0	0	1	2	2	0			0	0	70	1	1	0	0	0	0	1	164	66	24.539	0	70	1	1	1	0	0	1	0	1	0	0	1	0	0
295	A	男	61	1	0	305	177	1	92	0	1	0	0	0	0	1	1	1	0			0	0	1	0	0	0	0	0	0	1	161	67	25.8478	0	1	1	0	1	1	1					1	0	0	0
296	A	男	68	1	0	494	158	1	95	0	2	1	0	0	0	1	1	1	0			0	0	78	0	0	0	0	0	0	1	166	61	22.1367	0	78	0	1	1	0	0	0	0	1	1	1	0	0	0
297	A	男	73	1	0	380	194	1	65	0	2	1	0	0	0	1	1	1	0			0	0	2	0	0	0	0	0	0	1	160	46	17.9688	0	2	1	1	1	0	0					0	0	0	0
298	A	男	77	1	0	336	180	1	72	0	3	1	0	0	0	1	1	2	0			0	0	84	0	0	0	0	0	0	1	153	63	26.9127	0	84	0	0	1	0	0	1	姉AVR+CABG	0	0	0	0	0	0
299	A	女	79	1	0	357	222	1	134	0	1	0	0	0	0	1	1	1	0			0	0	91	0	0	0	0	0	0	1	138	37	19.4287	0	91	0	1	1	1	0	0	0	0	0	0	0	0	0
300	A	男	78	1	0	314	221	1	62	0	1	0	0	0	0	1	1	1	0			0	0	72	0	0	0	0	0	0	1	145	38	18.0737	0	72	1	0	0	0	0					1	0	0	0
301	A	男	79	1	0	368	214	1	102	0	2	1	0	0	0	1	1	1	0			0	0	17	0	0	0	0	0	0	0	162	69	26.2917	0	17	1	1	1	0	0			0	1	0	0	0	0
302	A	女	55	1	0	370	208	1	68	0	2	0	0	0	0	1	1	2	0			0	0	81	1	0	0	0	0	0	1	160	49	19.1406	0	81	1	1	0	0	0	1	父心筋症	0	0	0	0	0	0
303	A	女	74	1	0	332	155	1	116	0	1	0	0	0	0	1	1	1	0			0	0	89	0	0	0	0	0	0	1	149	55	24.7737	0	89	0	1	0	0	0					0	0	0	0
304	A	女	74	1	0	426	231	1	97	0	1	0	0	0	0	1	1	1	0			0	0	129	0	0	0	0	0	0	1	147	45	20.8247	0	129	0	1	1	0	0					0	0	0	0
305	A	男	75	1	0	282	127	1	103	0	1	0	0	0	0	1	1	1	0			0	0	139	0	0	0	0	0	0			55			139		1	0	0	0					0	0	0	0
306	A	男	59	1	0	388	55	0	0	0	1	0	0	0	0	1	1	1	0			0	0	143	0	0	0	0	0	0	1	174	54	17.8359	0	143		0	1	0	0					0	1	0	0
307	A	女	51	1	0	502	212	1	113	0	1	1	0	0	0	1	1	1	0			0	0	144	0	0	0	0	0	0	0	145	42	19.9762	0	144		1	1	1	0					0	0	1	1
308	B	女	64	0	1	282				0	3	1	0	0	0	1	2	2	0			0	0	12	0	0	0	0	0	0	1	143.7	75.1	36.3686	1	12	1	1	1	1	1	0	0	0	0	0	0	0	1
309	B	男	72	1	0	307	182		84	0	2	1	0	0	0	1	1	1	0			0	0	38	0	0	0	0	0	0	1	156.3	47.4	19.4026	0	38	0	1	1	1	1	0	0	0	1	0	0	0	0
310	B	男	53	1	0	512	307		102	0	2	1	0	0	0	1	1	1	0			0	0	50	0	0	0	0	0	0	1	163	60.35	22.7144	0	50	1	1	1	0	0	1	1	0	1	1	0	0	0
311	B	男	81	0	1	364				0	3	0	1	0	0	1	2	2	0			0	0	9.5	0	0	0	0	0	0	1	161.9	56.1	21.4027	0	9.5	1	1	1	0	0	0	0	0	0	0	0	0	0
312	B	男	74	0	1	382				0	6	1	1	0	0	1	2	4	0			0	0	6.5	0	0	0	0	0	0	1	163.7	55.3	20.6361	0	6.5	0	0	1	1	0	0	0	0	0	1	0	0	1
313	B	女	63	0	1	191				0	3	0	1	0	0	1	1	2	0			0	0	41.7333	0	0	0	0	0	0	1	144	48	23.1481	0	41.7333	0	1	1	1	1	0	0	0	0	1	0	0	0
314	B	女	82	1	0	358	351		118	0	2	0	0	0	0	1	2	2	0			0	0	0.9	0	0	0	0	0	0	1	148	40.5	18.4898	0	0.9	0	1	1	1	1	0	0	0	0	0	0	1	1
315	B	男	72	1	0	480	321		85	0	2	0	0	1	0	1	1	1	0			0	0	49.2	0	0	0	0	0	0	1	164.7	55.6	20.4969	0	49.2	1	1	1	0	0	0	0	0	1	1	1	0	1
316	B	女	65	0	0	208	104			0	3	1	0	0	0	1	1	2	0			0	0	48.8	0	0	0	0	0	0	1	151	50	21.9289	0	48.8	1	1	0	1	0	0	0	0	0	0	0	0	0
317	B	男	79	0	1	255				0	2	1	0	0	0	1	1	1	0			1	1	34.3333	0	0	0	0	0	0	1	165	63.6	23.3609	0	34.3333	0	1	1	1	0	0	0	1	1	0	0	0	1
318	B	女	77	1	0	477	253		135	0	2	1	0	0	0	1	1	1	0			0	0	2.33333	0	0	0	0	0	0	1	141.5	42	20.9767	0	2.33333	0	1	1	1	0	0	0	0	1	0	0	1	1
319	B	男	72	0	1	233				0	4	1	0	1	0	1	1	2	0			0	0	42.2	0	0	0	0	0	0	1	158	79.8	31.966	1	42.2	1	1	1	1	0	0	0	0	1	0	0	0	1
320	B	男	60	0	0	282	138			1	3	1	0	0	0	1	2	2	0			0	0	0.966667	0	0	0	0	0	0	1	163	43.5	16.3725	0	0.966667	0	0	1	0	0	0	0	0	0	0	0	1	1
321	B	女	81	0	0	311	173			0	4	1	0	0	0	1	2	3	0			0	0	43.6667	0	0	0	0	0	0	1	146.3	53.15	24.8322	0	43.6667	1	0	1	1	0	0	0	0	0	1	1	0	0
322	B	女	76	1	0	322	206		66	0	3	1	0	0	0	1	1	4	0			0	0	46.1667	0	0	0	0	0	0	1	148.9	57.35	25.8669	0	46.1667	1	1	1	1	1	1	1	0	1	0	0	0	1
323	B	女	84	1	0	386	215		99	0	1	0	0	0	0	1	1	1	0			0	0	36.1667	0	0	0	0	0	0	1	151.5	60.7	26.4462	0	36.1667	0	1	1	1	0	1	1	0	0	1	0	0	0
324	B	男	52	0	0	237	97			0	2	1	0	0	0	1	1	1	0			0	0	40.6333	0	0	0	0	0	0	1	157.6	59.5	23.9555	0	40.6333	1	1	0	1	1	0	0	0	0	0	0	1	1
325	B	女	75	1	0	291	179		79	0	1	0	0	0	0	1	1	1	0			0	0	6.56667	0	0	0	0	0	0	1	144.5	55.4	26.5322	0	6.56667	0	1	1	1	1	0	0	0	0	0	0	0	1
326	B	男	73	1	0	327	212		147	0	1	0	0	0	0	1	1	1	0			0	0	1.46667	0	0	0	0	0	0	1	170	56	19.3772	0	1.46667	0	0	1	0	0	0	0	0	1	0	0	0	0
327	B	男	69	0	1	239				0	3	1	0	1	0	1	1	1	0			0	0	45.4333	0	0	0	0	0	0	0	162	63.35	24.1389	0	45.4333	0	1	1	1	0	0	0	1	1	0	0	0	0
328	B	男	80	0	1	161				0	2	1	0	0	0	1	1	1	0			0	0	28.9333	0	0	0	0	0	0	1	157	58	23.5304	0	28.9333	0	1	1	1	0	0	0	0	1	0	0	1	1
329	B	男	78	0	1	255				0	4	1	0	1	0	1	1	2	0			1	1	1	0	0	0	0	0	0	0	168.5	60.89	21.446	0	39.6333	0	1	1	0	0	0	0	0	0	0	0	0	0
330	B	男	71	0	1	235				0	2	1	0	0	0	1	1	1	0			0	0	45.5	0	0	0	0	0	0	0	155.5	68.85	28.4737	0	45.5	0	1	1	1	0	0	0	0	0	0	0	0	1
331	B	男	70	0	0	339	172			0	4	1	0	0	0	1	2	3	0			0	0	0.6	0	0	0	0	0	0	1	158.7	54.8	21.7584	0	0.6	1	1	1	1	0	0	0	0	0	0	0	0	1
332	B	男	85	1	0	372	177		82	0	1	0	0	0	0	1	1	1	0			0	0	36.3	0	0	0	0	0	0	1	159.8	59.4	23.2612	0	36.3	0	1	1	0	0	0	0	0	0	0	1	0	0
333	B	男	68	0	1	371				0	5	1	1	0	0	1	2	3	0			1	1	1	0	0	0	0	0	1	1	157.9	51.15	20.5155	0	37.3667	0	1	0	1	1	0	0	0	1	0	0	0	0
334	B	男	81	0	0	306	155			0	3	0	0	0	0	1	2	3	1	2	6	0	0	42.7333	0	0	0	0	0	0	1	160	51.8	20.2344	0	42.7333	1	1	1	0	0	0	0	0	1	0	0	0	1
335	B	男	85	1	0	313	127		64	0	1	0	0	0	0	1	1	1	0			0	0	35.4667	0	0	0	0	0	0	1	162.5	57.6	21.813	0	35.4667	0	1	1	0	0	0	0	0	0	0	0	0	1
336	B	男	74	1	1	335				0	2	0	1	0	0	1	1	1	0			0	0	39.9667	0	0	0	0	0	0	1	171.5	56.9	19.3457	0	39.9667	0	1	1	0	0	1	1	0	1	0	0	0	1
337	B	女	68	1	0	444	285		136	0	3	1	0	1	0	1	1	1	0			0	0	37.6333	0	0	0	0	0	0	1	139.9	53.45	27.3094	0	37.6333	0	1	1	1	0	0	0	0	0	0	0	0	0
338	B	男	85	0	1	208				0	3	1	0	0	0	1	1	2	1	2	6	0	0	35.9667	0	0	0	0	1	1	0	165.1	62.29	22.852	0	35.9667	0	1	1	0	0	0	0	0	1	0	0	0	1
339	B	男	73	0	1	290				0	4	1	0	1	0	1	1	1	1	2	6	0	0	35.7333	0	0	0	0	0	0	0	154.7	56.3	23.5249	0	35.7333	0	1	0	0	0	0	0	0	0	0	0	0	0
340	B	女	76	0	0	256	131			0	4	1	0	1	0	1	1	1	0			0	0	36.4	0	0	0	0	0	0	1	155	60	24.974	0	36.4	0	0	1	0	0	0	0	0	0	0	0	0	1
341	B	男	72	1	1	229				0	2	1	0	0	0	1	1	1	0			0	0	40.8667	0	0	0	0	0	0	1	163.1	53.5	20.1116	0	40.8667	0	1	1	1	1	1	1	0	1	0	1	0	1
342	B	男	60	0	1	209				0	3	1	0	0	0	1	1	2	1	2	6	0	0	39.5667	0	0	0	0	0	0	1	170	65.4	22.6298	0	39.5667	0	1	1	1	0	0	0	0	0	0	0	1	1
343	B	女	76	1	1	353	120		61	0	2	1	0	0	0	1	1	1	1	2	3, 6	0	0	20.1493	0	0	0	0	0	0	1	153.7	47.6	20.1493	0	39.2333	0	1	1	1	0	0	0	0	0	1	0	1	1
344	B	男	75	1	0	411	255		125	0	1	0	0	0	0	1	1	1	0			0	0	40.0667	0	0	0	0	0	0	1	169.3	81.8	28.539	0	40.0667	0	1	1	0	0	0	0	0	1	0	0	0	0
345	B	男	65	1	0	374	202		19	0	4	1	1	0	0	1	1	2	1	2	6, 7	0	0	38.5333	0	0	0	0	0	0	1	170	65.1	22.526	0	38.5333	1	1	1	0	0	1	1	1	1	0	1	0	0
346	B	男	80	0	0	437	115			0	2	1	0	0	0	1	1	1	0			0	0	3.6	0	0	0	0	0	0	1	170	71	24.5675	0	3.6	0	0	1	0	0	0	0	0	0	1	0	0	1
347	B	女	63	0	0	298	147			0	2	1	0	0	0	1	1	0	0			0	0	38.7	0	0	0	0	0	0	1	157.7	49.5	19.9041	0	38.7	0	1	1	1	0	0	0	0	1	0	0	0	1
348	B	男	70	1	1	579	172		139	0	3	1	0	0	0	1	2	2	1	2	3, 8	1	1	1	0	0	0	0	1	0	1	157.5	62.95	25.3767	0	31.8667	0	1	0	1	0	1	1	0	0	0	0	0	0
349	B	男	85	0	0	295	149			0	4	1	0	0	0	1	2	3	1	2	6	0	0	34.8	0	0	0	0	0	0	1	155.6	55.2	22.7992	0	34.8	0	1	1	0	0	0	0	0	0	0	0	0	0
350	B	男	65	0	1	239				0	3	1	1	0	0	1	1	1	1	1	9	0	0	30.5333	0	0	0	0	0	0	0	170.6	63.2	21.715	0	30.5333	0	1	0	1	0	0	0	0	0	0	0	0	1
351	B	男	77	0	1	234				0	3	1	1	0	0	1	1	1	1	1	9	0	0	23.2244	0	0	0	0	0	0	1	156.8	57.1	23.2244	0	32.2333	1	1	1	1	1	0	0	0	0	0	0	0	0
352	B	男	77	0	1	316				0	3	1	0	0	0	1	2	2	0			0	0	36.6667	0	0	0	0	0	0	1	163.1	58	21.8032	0	36.6667	0	1	1	0	0	0	0	0	0	0	0	0	1
353	B	男	72	0	0	356	73			1	4	1	0	1	0	1	1	2	0			0	0	6.03333	0	0	0	0	0	0	1	159.3	59.3	23.3681	0	6.03333	1	1	1	1	0	1	1	1	1	1	0	0	1
354	B	男	69	0	0	275	143			0	3	1	0	1	0	1	1	0	0			0	0	12.1333	0	0	0	0	0	0	1	162.5	65.9	24.9562	0	12.1333	0	1	1	0	0	0	0	0	0	0	0	0	0
355	B	男	81	0	0	305	135			0	4	1	0	0	0	1	2	3	1	2	6	0	0	21.6333	0	0	0	0	0	0	1	163.2	80.4	30.1867	1	21.6333	0	1	1	1	0	0	0	0	0	0	0	0	0
356	B	男	72	0	1	271				0	4	1	0	0	0	1	2	3	1	2	6	2	1	6	0	0	0	0	0	0	0	160.9	60.1	23.2147	0	35.2333	0	1	1	0	0	0	0	0	1	0	0	0	0
357	B	女	73	1	0	467	263		89	0	3	1	0	1	0	1	1	1	0			0	0	6.4	0	0	0	0	0	0	1	150	70.05	31.1333	1	6.4	0	0	1	1	0	0	0	0	0	0	0	0	0
358	B	男	65	0	1	297				0	4	1	0	0	0	1	2	3	1	2	6	0	0	35.7	0	0	0	0	0	0	1	162	66.3	25.2629	0	35.7	0	0	1	1	1	0	0	0	0	1	0	1	1
359	B	男	64	0	1	500				0	4	0	1	0	0	1	2	3	1	2	6	0	0	13.2	0	0	0	0	0	0	1	156	60.8	24.9836	0	13.2	0	1	1	1	1	1	1	0	0	1	0	1	1
360	B	男	72	1	0	528	304		148	0	1	0	0	0	0	1	1	1	0			0	0	2.53333	0	0	0	0	0	0	1	157.7	65.7	26.4181	0	2.53333	0	1	1	0	0	0	0	0	0	0	1	0	0
361	B	男	60	0	1	471				0	1	0	0	0	0	1	1	1	0			1	1	33.6667	0	0	0	0	0	0	1	175.2	73.8	24.043	0	33.6667	0	0	1	0	0	0	0	0	0	0	0	0	1
362	B	女	64	0	1	256				0	3	1	1	0	0	1	1	1	1	2	6	1	1	30.7667	0	0	0	0	0	0	0	153.4	64.5	27.41	0	30.7667	1	1	1	1	1	1	1	0	1	0	0	0	0
363	B	男	79	1	0	567	268		150	0	2	1	0	0	0	1	1	1	1	2	10	0	0	23.8333	0	0	0	0	0	0	1	153.9	51.4	21.7013	0	23.8333	0	1	1	0	0	0	0	0	0	0	0	0	0
364	B	男	75	0	1	355				0	5	1	1	0	0	1	2	3	1	2	10	0	0	27.9667	0	0	0	0	0	0	1	170.6	67.2	23.0893	0	27.9667	0	1	1	1	1	0	0	0	0	0	0	0	1
365	B	女	68	0	1	213				0	2	1	0	0	0	1	1	1	0			0	0	12.5	0	0	0	0	0	0	1	160	57	22.2656	0	12.5	0	0	1	1	0	0	0	0	0	0	0	0	0
366	B	男	60	0	1	280				0	3	1	1	0	0	1	1	1	1	1	9	0	0	31.415	0	0	0	0	0	0	0	164.2	84.7	31.415	1	30.8333	0	1	1	1	1	1	1	0	0	1	1	0	0
367	B	男	65	0	0	309	164			0	4	1	0	0	0	1	2	3	1	2	6	0	0	30.8333	0	0	0	0	0	0	1	167.6	62.1	22.1077	0	30.8333	0	1	1	1	0	0	0	0	1	0	0	0	0
368	B	男	85	0	1	209				0	3	1	0	0	0	1	2	1	1	2	10	0	0	9.86667	0	0	0	0	0	0	1	151.9	48.1	20.8463	0	9.86667	0	1	1	1	1	0	0	0	0	0	0	0	0
369	B	女	79	0	1	280				0	3	1	1	0	0	1	1	1	1	1	8	0	0	29.5333	0	0	0	0	0	0	1	147.4	44.4	20.4356	0	29.5333	0	0	1	0	0	0	0	0	0	0	0	0	1
370	B	女	84	1	0	300	168		73	0	2	1	0	0	0	1	1	1	1	2	6	0	0	25.1667	0	0	0	0	0	0	1	152.5	50.7	21.8006	0	25.1667	0	1	1	0	0	0	0	0	0	0	0	0	1
371	B	男	49	1	0	443	243		31	0	4	1	1	0	0	1	2	2	1	2	6	0	0	26.8	0	0	0	0	0	0	1	163.9	70.7	26.3185	0	26.8	1	1	1	1	1	0	0	0	0	0	0	0	0
372	B	男	71	0	1	265				0	4	1	1	0	0	1	2	1	1	1	9	0	0	24.4667	0	0	0	0	0	0	0	165.8	62.5	22.7358	0	24.4667	0	1	1	1	1	1	1	0	0	1	0	0	1
373	B	男	83	0	1	227				0	2	1	0	0	0	1	1	1	1	2	10	0	0	26.4	0	0	0	0	0	0	1	160.9	55	21.2447	0	26.4	0	1	1	0	0	0	0	0	0	0	1	0	0
374	B	女	64	1	0	275	205		89	0	1	0	0	0	0	1	1	1	0			0	0	26.4333	0	0	0	0	0	0	1	160.4	52.2	20.2891	0	26.4333	0	1	1	0	0	0	0	0	0	0	0	0	0
375	B	男	32	1	0	324	213		102	0	1	0	0	0	0	1	1	1	0			0	0	6.33333	0	0	0	0	0	0	0	169	70.4	24.649	0	6.33333	0	1	0	0	0	0	0	0	0	0	0	0	0
376	B	男	80	0	1	301				0	4	1	1	0	0	1	1	1	1	1	9	0	0	24.5333	0	0	0	0	0	0	1	161.4	63.9	24.5298	0	24.5333	0	1	1	0	0	1	1	0	0	0	1	0	1
377	B	男	76	0	1	248				0	3	1	0	0	0	1	2	2	1	2	6	0	0	37.4333	0	0	0	0	0	0	0	156.3	58.5	23.9463	0	37.4333	0	1	1	1	1	0	0	0	0	0	0	0	1
378	B	男	57	1	0	411	226		28	0	5	1	1	0	0	1	2	3	1	2	6	0	0	25.2333	0	0	0	0	0	0	1	168.5	72.25	25.4471	0	25.2333	1	1	1	1	1	0	0	0	1	0	0	0	0
379	B	男	71	0	1	280				0	2	1	0	0	0	1	1	1	1	1	11	0	0	20.5	0	0	0	0	0	0	1	168.3	61.45	21.6947	0	20.5	1	1	1	1	0	0	0	0	0	1	0	0	0
380	B	女	81	1	0	335	193		71	0	2	1	0	0	0	1	1	1	1	1	11	0	0	18.9333	0	0	0	0	0	0	1	152.3	58.65	25.2853	0	18.9333	0	1	1	1	0	0	0	0	0	0	0	0	1
381	B	男	76	0	1	322				0	4	1	1	0	0	1	2	2	1	2	10	0	0	21.7333	0	0	0	0	0	0	1	170.2	63.75	22.007	0	21.7333	0	1	1	0	0	0	0	0	0	0	0	1	0
382	B	男	76	1	0	469	284		181	0	1	0	0	0	0	1	1	1	0			0	0	18.8	0	0	0	0	0	0	1	163.9	64.5	24.0105	0	18.8	0	1	1	0	0	0	0	0	0	0	0	0	1
383	B	男	79	0	0	341	191			0	5	1	0	0	0	1	1	4	1	2	10	0	0	22.4667	0	0	0	0	0	0	1	161	68.6	26.465	0	22.4667	0	1	1	1	0	0	0	0	0	0	0	0	1
384	B	男	80	0	0	395	206		48	0	3	1	1	0	0	1	1	1	0			0	0	21.4333	0	0	0	0	0	0	1	158.6	54.9	21.8256	0	21.4333	0	0	1	0	0	0	0	0	0	0	1	0	1
385	B	男	71	0	1	287				0	4	1	1	0	0	1	1	2	1	1	9	0	0	19.1	0	0	0	0	0	0	1	157.8	55.3	22.2081	0	19.1	0	1	1	1	0	0	0	0	1	0	0	0	1
386	B	男	75	0	1	204				0	3	0	1	1	0	1	1	1	0			0	0	18.7667	0	0	0	0	0	0	0	161.8	64.1	24.485	0	18.7667	1	1	1	1	0	1	1	0	0	1	0	0	0
387	B	男	71	1	1	446	189		133	0	2	1	0	0	0	1	1	1	0			0	0	17.3667	0	0	0	0	0	0	1	160.8	72.7	28.1166	0	17.3667	0	1	1	1	0	1	1	0	1	0	0	0	0
388	B	男	79	0	1	259				0	3	1	1	0	0	1	1	1	1	1	9, 12	0	0	19.2667	0	0	0	0	0	0	0	163.2	64.9	24.3671	0	19.2667	0	1	1	1	0	1	1	0	0	0	0	0	0
389	B	男	47	0	1	393				0	4	1	1	0	0	1	1	2	0			0	0	3.13333	0	0	0	0	0	0	1	174.2	90.3	29.7572	0	3.13333	0	1	1	1	1	0	0	1	1	0	0	1	1
390	B	女	82	1	0	445	182		88	0	1	0	0	0	0	1	1	1	0			0	0	19.2	0	0	0	0	0	0	1	145	44	20.9275	0	19.2	0	0	1	0	0	0	0	1	1	0	0	0	1
391	B	男	78	1	0	317	198		108	0	1	0	0	0	0	1	1	1	0			0	0	6.1	0	0	0	0	0	0	1	162.2	64.05	24.3454	0	6.1	0	1	1	0	0	0	0	0	0	0	0	0	0
392	B	女	53	0	1	325				0	3	1	1	0	0	1	1	1	1	2	10	0	0	7.06667	0	0	0	0	0	0	1	163	36.9	13.8884	0	7.06667	0	0	1	0	0	0	0	0	0	0	0	1	1
393	B	男	82	1	0	479	284		88	0	3	1	0	0	0	1	2	2	0			0	0	1.6	0	0	0	0	0	0	1	165.9	49.5	17.9851	0	1.6	1	0	0	1	1	0	0	1	1	0	0	0	1
394	B	男	83	1	1	336	120		80	0	2	1	0	0	0	1	1	1	0			0	0	5.3	0	0	0	0	0	0	1	167.5	58.3	20.7797	0	5.3	0	1	1	1	0	0	0	0	0	0	0	1	1
395	B	男	66	1	0	743	554		417	0	1	0	0	0	0	1	1	1	0			0	0	1.13333	0	0	0	0	0	0	1	165.5	48.3	17.634	0	1.13333	0	1	1	0	0	0	0	0	0	0	1	0	0
396	B	女	67	0	1	257				0	3	1	0	0	0	1	1	2	0			0	0	16.8333	0	0	0	0	0	0	1	146.3	34.5	16.1187	0	16.8333	0	1	1	1	1	1	1	0	0	0	0	0	1
397	B	男	80	0	1	327				0	4	1	1	0	0	1	1	2	0			1	1	0.5	0	0	0	0	0	0	1	155.7	50.3	20.7487	0	12.8667	0	0	1	1	1	1	1	0	0	1	0	0	0
398	B	男	81	1	0	488	265		106	0	2	1	0	0	0	1	1	1	0			0	0	6.1	0	0	0	0	0	0	1	154.6	60.6	25.3544	0	6.1	0	1	1	0	0	0	0	0	0	0	0	0	0
399	B	男	79	1	1	332	163		74	0	1	0	0	0	0	1	1	1	0			0	0	0.633333	0	0	0	0	0	0	1	159.1	57.6	22.7553	0	0.633333	0	0	1	0	0	0	0	0	0	0	0	0	0
400	B	男	68	1	0	657	216		95	0	1	0	0	0	0	1	1	1	0			0	0	4.43333	0	0	0	0	0	0	0	167.8	71.85	25.5178	0	4.43333	0	1	1	1	1	0	0	0	0	1	1	0	0
401	B	男	55	1	0	589	343		38	0	4	1	1	0	0	1	1	1	0			0	0	12.1	0	0	0	0	0	0	1	172.1	89.7	30.2852	1	12.1	1	1	1	1	0	0	0	0	1	0	0	0	0
402	B	男	63	1	0	334	183		33	0	3	1	0	1	0	1	1	2	0			0	0	12.4	0	0	0	0	0	0	1	170.4	65.9	22.6958	0	12.4	1	1	1	1	0	0	0	0	1	0	0	0	0
403	B	女	80	0	1	276				0	3	1	0	1	0	1	1	2	0			0	0	12.7333	0	0	0	0	0	0	1	155	61.4	25.5567	0	12.7333	0	1	1	1	1	0	0	0	0	0	0	0	0
404	B	男	34	1	0	579	420		253	1	1	0	0	0	0	1	1	1	0			0	0	0.4	0	0	0	0	0	0	1	186.5	112.6	32.3728	1	0.4	0	0	1	0	0	0	0	0	0	0	0	0	0
405	B	男	45	0	1	357				0	3	1	1	0	0	1	1	1	0			0	0	0.166667	0	0	0	0	0	0	1	172.3	92.05	31.0065	1	0.166667	1	1	1	1	1	0	0	0	1	1	0	1	1
406	B	男	68	1	0	471	255		52	0	5	1	1	1	0	1	1	2	0			0	0	6.33333	0	0	0	0	0	0	1	164	61.7	22.9402	0	6.33333	1	1	1	1	0	0	0	1	1	1	0	0	0
407	B	男	64	1	0	437	232		54	0	4	1	1	0	0	1	1	2	0			0	0	9.46667	0	0	0	0	0	0	1	164	59.15	21.9921	0	9.46667	0	1	1	1	0	0	0	0	1	0	0	1	1
408	B	男	57	0	1	326				0	5	1	1	0	0	1	1	2	0			0	0	9.6	0	0	0	0	0	0	1	178.8	103.1	32.2495	1	9.6	0	1	1	1	1	1	1	0	1	1	0	1	1
409	B	女	82	0	1	296				0	4	1	0	0	0	1	2	3	0			0	0	6.03333	0	0	0	0	0	0	1	148.2	45.4	20.6709	0	6.03333	0	1	1	0	0	1	1	0	0	0	0	0	1
410	B	男	82	0	0	531	109			0	3	1	0	0	0	1	1	2	0			0	0	8.36667	0	0	0	0	0	0	1	160	61.8	24.1406	0	8.36667	0	1	1	0	0	1	1	0	0	0	0	0	0
411	B	男	84	0	1	276				0	3	1	0	0	0	1	2	2	0			1	1	1	0	0	0	0	0	0	1	147	49.55	22.9303	0	2.66667	0	0	1	0	0	0	0	0	0	0	0	1	1
412	B	男	72	0	1	280				0	4	1	1	0	0	1	1	1	0			0	0	5.06667	0	0	0	0	0	0	1	164	58.5	21.7504	0	5.06667	0	0	1	1	1	0	0	1	1	0	0	0	1
413	B	男	79	0	1	337				0	4	1	1	0	0	1	1	1	0			0	0	0.9	0	0	0	0	0	0	1	164	57.8	21.4902	0	0.9	0	1	1	1	0	0	0	0	0	0	0	0	0
414	B	男	75	0	1	226				0	3	1	0	0	0	1	1	2	0			0	0	0.7	0	0	0	0	0	0	1	156.2	52.75	21.6202	0	0.7	0	1	1	1	1	0	0	0	0	0	1	0	0
415	B	男	70	0	1	371				0	3	1	0	0	0	1	1	2	0			0	0	1.76667	0	0	0	0	0	0	1	158.9	80.1	31.7238	1	1.76667	0	1	1	0	0	0	0	0	1	0	0	0	0
416	B	男	68	0	1	359				0	4	1	1	0	0	1	1	2	0			0	0	0.733333	0	0	0	0	0	0	1	152.7	46.9	20.1138	0	0.733333	0	1	0	1	1	0	0	0	1	0	1	0	0
417	B	女	57	0	1	256				0	3	1	1	0	0	1	1	1	0			0	0	20	0	0	0	0	0	0	1	153.6	43.1	18.2682	0	20	1	1	1	1	1	1	1	0	0	1	1	1	1
418	B	男	69	0	1	297				0	3	1	1	0	0	1	1	1	0			0	0	19	0	0	0	0	0	0	1	164.6	61.2	22.5887	0	19	1	1	1	1	0	1	1	0	0	1	0	0	0
419	B	男	74	0	1	331				0	3	1	1	0	0	1	1	1	0			0	0	19	0	0	0	0	0	0	0	164.8	90.25	33.2302	1	19	0	1	1	1	0	0	0	0	1	0	0	0	0
420	B	男	73	0	1	226				0	3	1	0	0	0	1	1	2	0			1	1	1	0	0	0	0	0	0	1	149	61	27.4762	0	19	0	1	1	0	0	0	0	0	0	0	0	0	1
421	B	男	67	0	1	197				0	2	1	0	0	0	1	1	1	0			0	0	19	0	0	0	0	0	0	1	171.5	70.3	23.9016	0	19	1	1	1	1	0	1	1	0	0	0	0	0	1
422	B	男	68	0	1	319				0	3	0	1	0	0	1	2	2	0			0	0	19	0	0	0	0	0	0	1	166.1	56.5	20.479	0	19	0	1	1	1	0	0	0	0	0	1	0	1	1
423	B	男	63	0	1	339				0	4	1	1	0	0	1	2	1	0			0	0	18	0	0	0	0	0	0	1	172.1	75.45	25.474	0	18	0	1	1	1	0	1	1	0	0	0	0	0	1
424	B	男	75	0	0	409	190			1	4	1	1	0	0	1	2	1	0			0	0	18	0	0	0	0	0	0	1	159.2	45.6	17.992	0	18	0	1	1	1	0	0	0	0	0	1	0	1	1
425	B	男	79	1	0	332	108		178	0	1	0	0	0	0	1	1	1	0			0	0	17	0	0	0	0	0	0	1	159.6	59.3	23.2803	0	17	0	0	1	0	0	0	0	0	0	0	1	0	1
426	B	男	74	1	0	396	59		261	0	2	1	0	0	0	1	1	1	0			0	0	17	0	0	0	0	0	0	1	167.4	71.9	25.6577	0	17	1	1	1	1	1	0	0	0	0	1	1	1	1
427	B	女	79	0	1	308				0	4	1	0	0	0	1	2	3	0			0	0	16	0	0	0	0	0	0	1	150	61.5	27.3333	0	16	1	1	1	1	0	0	0	0	0	0	0	0	1
428	B	男	75	0	1	279				0	3	0	1	0	0	1	1	1	0			0	0	15	0	0	0	0	0	0	1	165	68.5	25.1607	0	15	1	1	1	1	1	1	1	0	0	1	1	0	0
429	B	男	81	0	1	428				0	4	1	1	0	0	1	1	1	0			0	0	15	0	0	0	0	0	0	1	154.2	61.1	25.6964	0	15	0	1	0	0	0	0	0	0	0	0	0	0	0
430	B	男	70	0	0	333	95			0	3	1	0	0	0	1	2	2	0			0	0	14	0	0	0	0	0	0	1	161.3	62.7	24.099	0	14	1	1	1	1	0	0	0	0	0	1	1	1	1
431	B	男	72	0	1	327				0	3	1	1	0	0	1	1	1	0			0	0	14	0	0	0	0	0	0	1	160.5	50.5	19.6038	0	14	0	1	1	0	0	0	0	0	0	0	0	0	0
432	B	男	79	1	0	388	258		145	0	2	1	0	0	0	1	1	1	0			0	0	13	0	0	0	0	0	0	1	166.7	61.9	22.2751	0	13	0	1	1	0	0	0	0	0	0	0	0	0	1
433	B	男	68	0	1	279				0	3	1	0	0	0	1	2	2	0			0	0	12	0	0	0	0	0	0	1	158.8	59	23.3965	0	12	0	1	1	0	0	0	0	1	1	0	1	1	1
434	B	男	48	0	1	257				0	3	1	0	0	0	1	2	2	0			0	0	12	0	0	0	0	0	0	1	171.5	84.1	28.5935	0	12	0	1	1	1	1	0	0	1	1	0	1	1	1
435	B	女	85	0	1	230				0	3	1	0	0	0	1	1	1	0			0	0	12	0	0	0	0	0	0	1	149.7	62.15	27.733	0	12	0	1	1	1	0	0	0	0	0	0	0	0	0
436	B	男	70	0	1	265				0	3	1	1	0	0	1	1	1	0			0	0	12	0	0	0	0	0	0	1	171.2	66	22.5183	0	12	0	1	1	0	0	0	0	0	0	0	0	0	0
437	B	男	76	1	0	473	255		83	0	3	1	1	0	0	1	1	1	0			0	0	12	0	0	0	0	0	0	0	163.2	67.1	25.1931	0	12	1	1	1	1	0	1	1	0	0	0	1	0	0
438	B	男	65	0	1	291				0	3	1	1	0	0	1	1	1	0			0	0	11	0	0	0	0	0	0	1	176.5	72.9	23.4012	0	11	0	1	1	1	0	1	1	0	0	0	0	0	0
439	B	男	52	0	1	264				0	3	1	0	0	0	1	2	2	0			0	0	11	0	0	0	0	0	0	1	164.2	67.5	25.0356	0	11	0	1	1	1	0	0	0	0	0	0	1	1	1
440	B	女	69	1	0	260	175		96	0	1	0	0	0	0	1	1	1	0			0	0	10	0	0	0	0	0	0	1	154.1	52.3	22.024	0	10	0	1	1	1	1	0	0	0	0	0	0	0	0
441	B	女	80	0	1	261				0	3	1	0	0	0	1	2	2	0			0	0	10	0	0	0	0	0	0		151.2	55.7	24.3642	0	10	0	1	1	1	0	1	1	0	0	0	0	0	1
442	B	男	67	0	1	234				0	2	1	0	0	0	1	1	1	0			0	0	10	0	0	0	0	0	0	1	169	77	26.9598	0	10	1	1	1	0	0	0	0	0	0	1	1	1	1
443	B	男	55	0	1	221				0	2	1	0	0	0	1	1	1	0			0	0	10	0	0	0	0	0	0		178	79.9	25.2178	0	10	0	1	1	0	0	0	0	1	1	0	0	0	0
444	B	男	76	0	1	392				0	5	1	1	0	0	1	1	4	0			0	0	9	0	0	0	0	0	0		166.3	64.3	23.2502	0	9	0	1	1	0	0	0	0	0	0	0	0	0	0
445	A	男	74	0	1	107		0		0	1	1	0	0	0	0	0	0	0			0	0	5	0	0	0	0	0	0	0	159.7	60.2	23.6041	0	5	1	0	1	1	1			0	1	0	1	0	0
446	A	男	63	0	1	210		0		0	2	1	0	1	0	0	0	0	0			0	0	23	0	0	0	0	0	0	1	162.5	87.8	33.2497	1	23	0	1	1	1	0	0	0	0	1	0	0	0	0
447	A	男	68	0	0	305	99	0		0	4	1	0	1	0	0	0	0	0			0	0	37	0	0	0	0	0	0	1	159.1	61	24.0985	0	37	0	0	1	1	1	0	0	1	1	0	0	0	0
448	A	女	59	0	0	481	109	0		0	1	1	0	0	0	0	0	0	0			0	0	29	0	0	0	0	0	0	1	159.8	49.2	19.2669	0	29	1	1	1	0	0	0	0	0		0	0	0	0
449	A	女	57	0	0	433	179	0		0	2	1	0	1	0	0	0	1	0			0	0	9	0	0	0	0	0	0	1	148.6	55.8	25.2695	0	9	1	1	1	1	0	0	0	0	0	0	0	0	0
450	A	男	82	0	1	195		0		0	1	1	0	0	0	0	0	0	0			0	0	1	0	0	0	0	0	0	1	165	57	20.9366	0	1	1	1	1	1	0	0	0	0	1	0	0	0	0
451	A	男	74	0	1	218		0		0	2	1	0	1	0	0	0	0	0			0	0	64	0	0	0	0	0	0	1	155	43	17.898	0	64	1	0	1	1	1	0	0	0	1	1	0	0	0
452	A	男	62	0	1	194		0		0	2	1	0	1	0	0	0	0	0			0	0	35	0	0	0	0	0	0	1	162	64	24.3865	0	35	0	0	0	0	0	0	0	0	1	1	1	0	0
453	A	男	69	0	1	247		0		0	2	1	0	1	0	0	0	0	0			0	0	85	0	0	0	0	0	0	1	150	52	23.1111	0	85	0	1	0	0	0	0	0	0	0	1	0	0	0
454	A	男	74	0	1	169		0		0	2	1	1	0	0	0	0	0	0			0	0	2	0	0	0	0	0	0	0	161.1	58.95	22.714	0	2	1	0	1	1	0					1	0	1	1
455	A	男	70	0	1	181		0		0	2	1	0	0	1	0	0	0	0			0	0	2	0	0	0	0	0	0	1	162.5	78	29.5385	0	2	1	0	1	0	0	0	0	0	1	0	0	0	1
456	A	男	64	0	1	107		0		0	1	1	0	0	0	0	0	0	0			0	0	6	0	0	0	0	0	0	1	160	48.8	19.0625	0	6	1				0			1	1	0	0	0	0
457	A	男	60	0	0	238	83	0		0	2	1	1	0	0	0	0	0	0			0	0	7	0	0	0	0	0	0	1	166.8	80.3	28.8618	0	7	1	1	1	0	0					1	0	0	0
458	A	男	56	0	1	149		0		0	1	1	0	0	0	0	0	0	0			0	0	10	0	0	0	0	0	0	0	168.6	75.75	26.6482	0	10	0	0	1	0	0			0	1	1	0	0	0
459	A	男	64	0	1	161		0		0	3	1	0	1	0	0	0	0	0			0	0	10	0	0	0	0	0	0	0	160	55.4	21.6406	0	10	0	1	1	1	0			0	0	0	0	0	0
460	A	男	71	0	1	143		0		0	2	1	0	1	0	0	0	0	0			0	0	13	0	0	0	0	0	0	1	176	70	22.5981	0	13	0	0	0	1	0			1	1	0	0	0	0
461	A	男	59	0	1	152		0		0	2	1	0	1	0	0	0	0	0			0	0	13	0	0	0	0	0	0	0	176	70.4	22.7273	0	13	0	1	0	0	0			0	0	0	0	0	0
462	A	男	56	0	1	177		0		0	2	1	0	1	0	0	0	0	0			0	0	14	0	0	0	0	0	0	0	174.3	62.5	20.5724	0	14	0	0	1	0	0			0	1	0	0	0	0
463	A	男	82	0	1	99		0		0	1	1	0	0	0	0	0	0	0			0	0	19	0	0	0	0	0	0	1	158.9	44.2	17.5055	0	19	0	1	1	0	0	0	0	0	1	0	0	0	0
464	A	男	86	0	1	85		0		0	1	1	0	0	0	0	0	0	0			0	0	20	0	0	0	0	0	0	0	156.2	53.1	21.7637	0	20	0	1	1	0	0	0	0	0	0	0	0	0	0
465	A	男	48	0	1	133		0		0	1	1	0	0	0	0	0	0	0			0	0	23	0	0	0	0	0	0	0	172.7	82.2	27.5605	0	23	1	0	0	0	0	0	0	0	1	1	0	0	0
466	A	男	71	0	1	147		0		0	2	1	0	1	0	0	0	0	0			0	0	23	0	0	0	0	0	0	0	152	55.3	23.9352	0	23	0	1	1	0	0	0	0	1	1	0	1	0	0
467	A	男	55	0	1	151		0		0	2	1	0	1	0	0	0	0	0			0	0	23	0	0	0	0	0	0	0	173	76.1	25.4268	0	23	0	1	1	0	0	0	0	1	1	0	0	0	0
468	A	男	70	0	1	198		0		0	1	1	0	0	0	0	0	0	0			0	0	6	0	0	0	1	0	0	0	158	62.8	25.1562	0	6	0	1	0	0	0	0	0	1	1	1	0	0	0
469	A	男	62	0	1	172		0		0	2	1	0	1	0	0	0	0	0			0	0	28	0	0	0	0	0	0	1	157	61.8	25.072	0	28	0	0	1	0	0	1	1	1	1	1	0	0	0
470	A	男	78	0	1	210		0		0	1	1	0	0	0	0	0	0	0			0	0	29	0	0	0	0	0	0	0	180	60	18.5185	0	29	0	0	1	1	0	0	0	0	0	1	0	0	0
471	A	男	75	0	1	177		0		0	2	1	0	1	0	0	0	0	0			0	0	1	0	0	0	0	0	0	0	168	64.8	22.9592	0	1	0	1	0	0	0	0	0	0		0	0	0	0
472	A	男	70	0	1	199		0		0	3	1	0	1	0	0	0	0	0			0	0	34	0	0	0	0	0	0	0	163	66	24.841	0	34	0	0	1	0	0	0	0	0	1	0	0	0	0
473	A	男	39	0	1	201		0		0	3	1	0	1	0	0	0	0	0			0	0	38	0	0	0	0	0	0	0	174.5	72.7	23.875	0	38	0	1	0	0	0	0	0	0	1	0	0	0	0
474	A	男	77	0	1	158		0		0	1	1	0	0	0	0	0	0	0			0	0	13	0	0	0	0	0	0	0	157.6	61.8	24.8815	0	13	0	0	1	0	0	0	0	0	0	0	0	0	0
475	A	男	74	0	1	281		0		0	2	1	0	1	0	0	0	0	0			0	0	22	0	0	0	0	0	0	1	155.8	50.1	20.6397	0	22	1	1	1	0	0	0	0	0	0	1	0	0	0
476	A	男	55	0	1	276		0		0	2	1	0	1	0	0	0	0	0			0	0	48	0	0	0	0	0	0	1	165.8	41.1	14.9511	0	48	0	0	0	1	1	0	0	0		0	0	0	0
477	A	男	65	0	1	280		0		0	2	1	0	1	0	0	0	0	0			0	0	1	0	0	0	0	0	0	1	161.5	58.8	22.5441	0	1	0	1	0	0	0	1	母	0	1	1	0	0	0
478	A	男	66	0	1	124		0		0	1	1	0	0	0	0	0	0	0			0	0	23	0	0	0	0	0	0	0	172.1	54	18.2319	0	23	1	1	1	0	0	0	0	0	1	0	0	0	0
479	A	男	63	0	1	236		0		0	3	1	1	1	0	0	0	0	0			0	0	7	0	0	0	0	0	0	0	166.8	69.7	25.0519	0	7	1	0	1	1	0	0	0	0	0	1	0	0	0
480	A	男	59	0	0	290	109	0		0	2	1	0	1	0	0	0	0	0			0	0	15	0	0	0	0	0	0	0	176.2	92.25	29.7136	0	15	0	1	1	1	0	1	1	0	1	0	0	0	0
481	A	女	69	0	1	303		0		0	2	1	0	1	0	0	0	0	0			0	0	3	0	0	0	0	0	0	1	150.5	49.8	21.9865	0	3	0	1	0	1	1	0	0	0	0	0	0	0	0
482	A	男	63	0	1	206		0		0	1	1	0	0	0	0	0	0	0			0	0	5	0	0	0	0	0	0	0	155.8	62.5	25.7481	0	5	1	1	1	0	0	0	0	0	1	0	0	0	0
483	A	男	83	0	1	299		0		0	2	1	0	1	0	0	0	0	0			0	0	28	0	0	0	0	0	0	1		59.2			28	0	1	1	0	0	0	0	0	1	0	0	0	0
484	A	男	76	0	1	235		0		0	1	1	0	0	0	0	0	0	0			0	0	43	0	0	0	0	0	0	0	160	60	23.4375	0	43	0	1	1	1	0	0	0	0	1	0	1	0	0
485	A	男	63	0	0	258	121	0		0	2	1	0	1	0	0	0	0	0			0	0	31	0	0	0	0	0	0	0	160	76	29.6875	0	31	0	1	0	0	0	0	0	0	1	0	0	0	0
486	A	男	64	0	0	254		0		0	2	1	0	1	0	0	0	0	0			0	0	65	0	0	0	0	0	0	0	159.8	61.7	24.1619	0	65	0	1	1	0	0	1	1	0	1	0	0	0	0
487	A	男	53	0	1	256		0		0	2	1	0	1	0	0	0	0	0			0	0	53	0	0	0	0	0	0	0	167	75	26.8923	0	53	0	1	1	1	0	0	0	0	1	0	0	0	0
488	A	男	60	0	0	255	116	0		0	2	1	0	1	0	0	0	0	0			0	0	66	0	0	0	0	0	0	0	164	60	22.3081	0	66	0	1	1	0	0	0	0	1	1	0	0	0	0
489	A	男	66	0	1	146	0	0		0	1	1	0	0	0	0	0	0	0			0	0	1	0	0	0	0	0	0	0	177	55	17.5556	0	1	1	0	1	1	0					1	0	0	0
490	A	男	77	0	1	153		0		0	1	1	0	0	0	0	0	0	0			0	0	1	0	0	0	0	0	0	1	154	54	22.7694	0	1	0	1	1	1	0	0	0	0	1	0	0	0	1
491	A	男	58	0	0	321	96	0		0	3	1	0	1	0	0	0	0	0			0	0	68	0	0	0	0	0	0	1	174	68	22.46	0	68	0	1	1	1	0	1	母IHD	0	1	0	0	0	0
492	A	男	76	0	1	145		0		0	1	1	0	0	0	0	0	0	0			0	0	68	0	0	0	0	0	0	0	162	57	21.7193	0	68	0	0	1	0	0			0	1	0	0	0	0
493	A	男	84	0	1	346		0		0	1	1	0	0	0	0	0	0	0			0	0	70	0	0	0	0	0	0	1	160	48.7	19.0234	0	70	0	1	0	0	0	0	0	0	0	0	0	0	0
494	A	男	70	0	1	218		0		0	1	1	0	1	0	0	0	0	0			0	0	64	0	0	0	0	0	0	0	158	69	27.6398	0	64	0	0	1	0	0	0	0	0	1	0	0	0	0
495	A	女	80	0	1	172		0		0	1	1	0	0	0	0	0	0	0			0	0	73	0	0	0	0	0	0	0	145	51	24.2568	0	73	0	0	1	0	0	0	0	0	0	0	0	0	0
496	A	男	82	0	1	254		0		0	2	1	0	1	0	0	0	0	0			0	0	8	0	0	0	0	0	0	1	165	63	23.1405	0	8	0	1	1	0	0	1	1	1	1	0	1	0	0
497	A	男	72	0	1	197		0		0	1	1	0	0	0	0	0	0	0			0	0	83	0	0	0	0	0	0	0	173	79.4	26.5295	0	83	0	1	0	0	0	0	0	0	0	0	0	0	0
498	A	男	65	0	0	372	118	1	85	0	1	1	0	0	0	0	0	0	0			0	0	59	0	0	0	0	0	0	1	166	69	25.0399	0	59	0	1	1	0	0	0	0	0	0	1	0	0	0
499	A	男	64	0	0	240	43	0		0	2	1	0	1	0	0	0	0	0			0	0	85	0	0	0	0	0	0	0	172	75	25.3515	0	85	0	1	1	1	0	0	0	0	1	0	0	0	0
500	A	男	84	0	0	285	54	0		0	2	1	0	1	0	0	0	0	0			0	0	23	0	0	0	0	0	0	1	164	49	18.2183	0	23	1	1	1	0	0	1	父AMI	0	0	1	0	0	0
501	A	男	75	0	1	302		0		0	2	1	1	1	0	0	0	0	0			0	0	68	0	0	0	0	0	0	1	164	49	18.2183	0	68	0	1	1	1	0	0	0	0	1	0	0	0	1
502	A	男	72	0	1	264		0		0	1	1	0	0	0	0	0	0	0			0	0	88	0	0	0	0	0	0	1	171	78	26.6749	0	88	0	1	1	0	0	0	0	0	1	1	0	0	0
503	A	男	64	0	1	246		0		0	2	1	0	0	1	0	0	0	0			0	0	89	0	0	0	0	0	0	0		58			89	0	1	1	0	0	1	1	0	1	0	0	0	0
504	A	男	77	0	1	184		0		0	1	1	0	0	0	0	0	0	0			0	0	73	0	0	0	0	0	0	0	157	61	24.7475	0	73	1	1	0	1	0					0	0	0	0
505	A	男	66	0	1	163		0		0	1	1	0	0	0	0	0	0	0			0	0	92	0	0	0	0	0	0	0	156	58	23.833	0	92	1	1	1	0	0	0	0	0	1	0	0	0	0
506	A	男	69	0	1	258		0		0	2	1	0	1	0	0	0	0	0			0	0	1	0	0	0	0	0	0	1	154	60	25.2994	0	1	1	1	1	1	0	0	0	0	0	1	0	0	0
507	A	男	72	0	1	168		0		0	1	1	0	0	0	0	0	0	0			0	0	37	0	0	0	0	0	0	1	151	38	16.6659	0	37	0	0	0	1	0	0	0	0	1	0	0	0	0
508	A	男	71	0	1	385		0		0	3	1	1	1	0	0	0	0	0			0	0	82	0	0	0	0	0	0	1	168	71	25.1559	0	82	0	1	1	1	0	0	0	0	1	0	0	0	0
509	A	男	61	0	0	290	83	0		0	2	1	0	1	0	0	0	0	0			0	0	3	0	0	0	0	0	0	1	164	65	24.1672	0	3	0	1	1	0	0	0	0			1	0	0	0
510	A	男	68	0	1	192		0		0	1	1	0	0	0	0	0	0	0			0	0	83	0	0	0	0	0	0	0	167	61	21.8724	0	83	0	0	1	0	0	0	0	0	1	0	0	0	0
511	A	男	71	0	1	346		0		0	2	1	0	1	0	0	0	0	0			0	0	98	0	0	0	0	0	0	1	164	62	23.0518	0	98	0	0	1	1	1					0	0	0	0
512	A	男	65	0	1	211		0		0	1	0	0	1	0	0	0	0	0			0	0	57	0	0	0	0	0	0	0	172	62	20.9573	0	57	1	1	1	1	0					1	0	0	0
513	A	男	66	0	1	397		0		0	4	1	0	1	1	0	0	0	0			0	0	1	0	0	0	0	0	0	1	164	56	20.8209	0	1	1				0					0	0	0	0
514	A	男	67	0	1	138		0		0	1	1	0	0	0	0	0	0	0			0	0	106	0	0	0	0	0	0	1	157	67	27.1816	0	106	0	1	1	0	0					0	0	0	0
515	A	男	68	0	0	446	175	0		0	3	1	1	1	0	0	0	0	0			0	0	47	0	0	0	0	0	0	0	163	77	28.9811	0	47	0	0	1	1	0					0	1	0	0
516	A	男	78	0	0	335	98	0		1	2	1	0	1	0	0	0	0	0			0	0	76	0	0	0	0	0	0	1	159	43	17.0088	0	76	0	0	1	0	0					0	0	0	0
517	A	男	93	0	1	175	0	0		0	1	1	0	0	0	0	0	0	0			0	0	95	0	0	0	0	0	0	1	161	44	16.9747	0	95	1	0	0	0	0					0	0	0	0
518	A	男	73	0	1	194		0		0	2	1	0	1	0	0	0	0	0			0	0	90	0	0	0	0	0	0	0	162	57	21.7193	0	90	0	0	1	0	0	0	0	0	0	0	0	0	0
519	A	女	76	0	1	177		0		0	2	1	0	0	0	0	0	0	0			0	0	113	0	0	0	0	0	0	1	145	42	19.9762	0	113	0	1	1	0	0					0	0	0	0
520	A	男	74	0	0	277	115	0		0	2	1	0	1	0	0	0	0	0			0	0	60	0	0	0	0	1	0	0	168	69	24.4473	0	60	0	0	0	0	0	0	0	0	0	0	0	0	0
521	A	男	71	0	1	300		0		0	2	1	0	0	1	0	0	0	0			0	0	49	0	0	0	0	0	0	1	158	63	25.2363	0	49	1	0	1	1	0	0	0	0	1	1	0	0	0
522	A	男	77	0	1	200	0	0		0	1	1	0	0	0	0	0	0	0			0	0	115	0	0	0	0	0	0	0	160	66	25.7812	0	115	0	1	1	0	0	0	0	1	1	0	0	0	0
523	A	男	76	0	1	136		0		0	1	1	0	0	0	0	0	0	0			0	0	115	0	0	0	0	0	0	0	173	54	18.0427	0	115	0	1	1	1	0					1	0	0	1
524	A	女	76	0	1	214		0		0	1	1	0	0	0	0	0	0	0			0	0	1	0	0	0	0	0	0	0	136	55	29.7362	0	1	1	1	1	1	0					0	0	0	0
525	A	男	80	0	0	216	46	0		1	1	0	0	1	0	0	0	0	0			0	0	55	0	0	0	0	0	0	1	151	59	25.8761	0	55	0	1	1	0	0					0	0	0	0
526	A	男	58	0	0	210	60	0		0	2	1	0	1	0	0	0	0	0			0	0	1	0	0	0	0	0	0	0	167	71	25.4581	0	1	0	0	1	0	0	0		1	1	0	0	0	0
527	A	男	73	0	1	272		0		0	2	1	1	1	0	0	0	0	0			0	0	116	0	0	0	0	0	0	1	150	44	19.5556	0	116	1	1	1	0	0					0	0	0	0
528	A	男	73	0	1	146		0		0	1	1	0	0	0	0	0	0	0			0	0	117	0	0	0	0	0	0	0	158	44	17.6254	0	117	1	1	1	0	0					0	0	0	0
529	A	男	72	0	1	170		0		0	1	1	0	0	0	0	0	0	0			0	0	96	0	0	0	0	0	0	1	170	63	21.7993	0	96	0	1	1	1	0					0	0	0	0
530	A	男	66	0	0	518	234	0		0	3	1	1	1	0	0	0	0	0			0	0	1	0	0	0	0	0	0	1	165	48	17.6309	0	1	1	0	1	0	0					0	0	0	1
531	A	男	62	0	1	239		0		0	2	1	0	0	1	0	0	0	0			0	0	117	0	0	0	0	0	0	0	165	69	25.3444	0	117	1	1	1	0	0					0	0	0	0
532	A	男	71	0	1	323		0		0	1	1	0	1	0	0	0	0	0			0	0	101	0	0	0	0	0	0	1	150	55	24.4444	0	101	0	1	1	0	0	0	0	0	0	1	0	0	0
533	A	男	70	0	1	294		0		0	3	1	0	1	0	0	0	0	0			0	0	28	0	0	0	0	0	0	0	153	39	16.6603	0	28	1	1	0	0	0					0	0	0	1
534	A	男	65	0	1	389	44	0		0	2	1	0	1	0	0	0	0	0			0	0	88	0	0	0	0	0	0	1	165	64	23.5078	0	88	1	1	1	1	1			1	1	0	0	0	0
535	A	男	80	0	1	197		0		0	1	1	0	0	0	0	0	0	0			0	0	23	0	0	0	0	0	0	1	165	64	23.5078	0	23	0	1	1	0	0					0	0	0	0
536	A	女	73	0	0	236		0		0	2	1	0	1	0	0	0	0	0			0	0	121	0	0	0	0	0	0	0	147	53	24.5268	0	121	0	1	1	0	0					0	0	0	0
537	A	男	68	0	1	279		0		0	3	1	0	1	1	0	0	0	0			0	0	1	0	0	0	0	0	0	0	164	60	22.3081	0	1	0	1	1	0	0					0	0	0	1
538	A	男	64	0	1	336		0		0	1	0	0	1	0	0	0	0	0			0	0	105	0	0	0	0	0	0	1	170	44	15.2249	0	105	1	1	1	1	0					1	0	0	0
539	A	男	72	0	1	342		0		0	3	1	0	1	1	0	0	0	0			0	0	92	0	0	0	0	0	0	0	165	54	19.8347	0	92	0	1	1	1	0	0	0	0	1	0	0	0	0
540	A	男	54	0	1	283		0		0	2	1	0	1	0	0	0	0	0			0	0	123	0	0	0	0	0	0	0	167	59	21.1553	0	123	1	1	1	0	0					0	0	0	0
541	A	男	86	0	1	175		0		0	1	1	0	0	0	0	0	0	0			0	0	38	0	0	0	0	0	0	1	155	38	15.8169	0	38	0	0	1	1	0					0	0	0	0
542	A	男	60	0	1	245		0		0	2	1	0	0	1	0	0	0	0			0	0	124	0	0	0	0	0	0	0	161	66	25.462	0	124	1	1	1	0	0					0	0	0	0
543	A	男	50	0	1	253		0		0	2	1	0	1	0	0	0	0	0			0	0	1	0	0	0	0	0	0	0	172	81	27.3797	0	1	1	1	1	0	0					1	0	0	0
544	A	男	73	0	1	308		0		0	3	1	0	1	1	0	0	0	0			0	0	52	0	0	0	0	0	0	1	158	59	23.634	0	52	1	1	1	1	0					0	0	0	0
545	A	男	54	0	0	302	113	0		0	2	1	0	1	0	0	0	0	0			0	0	1	0	0	0	0	0	0	1	168	75	26.5731	0	1	1	1	1	0	0			0	1	1	0	0	0
546	A	男	76	0	0	421	108	0		0	2	1	0	1	0	0	0	0	0			0	0	1	0	0	0	0	0	0	1		54			1	1	0	1	0	0					1	0	0	0
547	A	男	72	0	1	257		0		0	2	1	0	1	0	0	0	0	0			0	0	28	0	0	0	0	0	0	1	160	49	19.1406	0	28	1	0	1	1	0					0	0	0	0
548	A	女	72	0	1	250		0		0	2	1	0	1	0	0	0	0	0			0	0	127	0	0	0	0	0	0	1	158	50	20.0288	0	127	1	1	1	0	0					1	0	0	0
549	A	男	65	0	1	169		0		0	1	1	0	0	0	0	0	0	0			0	0	127	0	0	0	0	0	0	0	163	63	23.7118	0	127	0	0	1	0	0					0	0	0	0
550	A	男	66	0	0	518	131	0		1	2	1	0	0	1	0	0	0	0			0	0	120	0	0	0	0	0	0	1	163	79	29.7339	0	120	1	1	0	0	0					1	0	0	0
551	A	男	51	0	1	330		0		0	3	1	0	1	0	0	0	0	0			0	0	1	0	0	0	0	0	0	1	180	80	24.6914	0	1	1	1	1	1	0					1	0	0	1
552	A	男	80	0	1	208		0		0	1	1	0	0	0	0	0	0	0			0	0	34	0	0	0	0	0	0	0	156	60	24.6548	0	34	1	1	1	0	0					1	0	0	0
553	A	男	71	0	1	182		0		0	1	1	0	0	0	0	0	0	0			0	0	40	0	0	0	0	0	0	0	154	49	20.6612	0	40	1	0	0	1	0			0	0	0	0	0	0
554	A	男	69	0	1	295		0		0	2	1	0	0	1	0	0	0	0			0	0	118	0	0	0	0	0	0	1	163	66	24.841	0	118	1	0	1	1	0					1	0	0	0
555	A	女	48	0	0	310	125	0		0	2	1	0	1	0	0	0	0	0			0	0	133	0	0	0	0	0	0	0	152	86	37.223	1	133		1	1	1	0						0	0	0
556	A	男	60	0	0	356	112	0		0	3	1	0	1	0	0	0	0	0			0	0	134	0	0	0	0	0	0	1	168	65	23.03	0	134	0	1	1	1	1			1	1	0	1	0	1
557	A	女	84	0	1	371		0		0	1	0	0	1	0	0	0	0	0			0	0	82	0	0	0	0	0	0	1	136	30	16.2197	0	82	0	1	1	1	0				0	0	0	0	1
558	A	女	72	0	1	177		0		0	1	1	0	0	0	0	0	0	0			0	0	135	0	0	0	0	0	0	0	150	33	14.6667	0	135	0	0	1	1	1	0		0	0	0	0	0	0
559	A	女	71	0	0	247		0		0	2	1	0	1	0	0	0	0	0			0	0		0	0	0	0	0	0	0						1									1	0	0	0
560	A	男	59	0	1	240		0		0	2	1	0	1	0	0	0	0	0			0	0	28	0	0	0	0	0	0	0	158	44	17.6254	0	28	0	0	1	0	0					0	0	0	0
561	A	女	65	0	1	156		0		0	1	0	0	0	0	0	0	0	0			0	0	19	0	0	0	0	0	0	1	145	51	24.2568	0	19	1	0	1	1	1					1	0	0	1
562	A	男	68	0	1	225		0		0	2	1	0	1	0	0	0	0	0			0	0	136	0	0	0	0	0	0	0	171	55	18.8092	0	136	1	0	1	1	1					0	0	0	0
563	A	男	58	0	1	323		0		0	3	1	1	0	1	0	0	0	0			0	0	137	0	0	0	0	0	0	1	162	45	17.1468	0	137	1	1	1	1	1					0	0	0	0
564	A	男	50	0	0	292	82	1	60	0	1	0	0	1	0	0	0	0	0			0	0	21	0	0	0	0	0	0	1					21	0	1	1	0	0					0	0	0	0
565	A	男	70	0	1	295		0		0	2	1	0	0	1	0	0	0	0			0	0	110	0	0	0	0	0	0	1	167	53	19.0039	0	110	0	0	1	1	1					0	0	0	0
566	A	男	66	0	1	249		0		0	2	1	0	0	1	0	0	0	0			0	0	138	0	0	0	0	0	0	0		71		0	138	1	1	1	1	0					0	0	0	0
567	A	男	42	0	1	263		0		0	2	1	0	0	1	0	0	0	0			0	0		0	0	0	0	0	0	0						1									1	0	0	0
568	A	男	58	0	1	246		0		0	2	1	0	1	0	0	0	0	0			0	0	141	0	0	0	0	0	0	0	168	67	23.7387	0	141	0	1	1	1	1					1	0	0	0
569	A	女	59	0	1	275		0		0	1	1	0	0	0	0	0	0	0			0	0	141	0	0	0	0	0	0	0	159	92	36.391	1	141	0	1	1	1	1					0	0	0	0
570	A	男	65	0	1	139		0		0	1	1	0	0	0	0	0	0	0			0	0	46	0	0	0	0	0	0	0	167	60	21.5139	0	46	0									0	0	0	0
571	A	男	59	0	1	214		0		0	2	1	0	1	0	0	0	0	0			0	0	142	0	0	0	0	0	0	0	175	73	23.8367	0	142	0	0	1	0	0					0	0	0	0
572	A	男	45	0	1	208		0		0	1	1	0	0	0	0	0	0	0			0	0	1	0	0	0	0	0	0	0					1	1									0	0	0	0
573	A	男	49	0	0	313	108	1	57	1	2	1	0	1	0	0	0	0	0			0	0	110	0	0	0	0	0	0	0	173	70	23.3887	0	110		1	1	0	0						0	0	0
574	A	男	54	0	1	275		0		0	2	1	0	0	1	0	0	0	0			0	0	142	0	0	0	0	0	0	1	167	85	30.478	1	142	0	1	0	1	0					0	0	1	1
575	A	男	79	0	1	261		0		0	2	1	0	0	1	0	0	0	0			0	0	117	0	0	0	0	0	0	1	157	53	21.5019	0	117	0	1	1	0	0					1	0	0	0
576	A	男	72	0	1	380		0		0	3	1	1	0	1	0	0	0	0			0	0	143	0	0	0	0	0	0	1	147	41	18.9736	0	143	1	0	1	0	0					0	0	0	0
577	A	男	66	0	0	354	164	1	25	0	2	1	0	0	1	0	0	0	0			0	0	1	0	0	0	0	0	0	1					1	0	0	1	0	0					0	0	0	0
578	A	男	75	0	1	239		0		0	1	0	1	0	0	0	0	0	0			0	0	99	0	0	0	0	0	0	1	146	37	17.3579	0	99	0	0	1	0	0					0	0	0	0
579	A	男	67	0	0	300	92	1	45	0	2	1	0	1	0	0	0	0	0			0	0	145	0	0	0	0	0	0	0	163	74	27.852	0	145	1	1	1	0	0					1	0	0	0
580	A	男	67	0	0	331	62	0		1	2	1	0	1	0	0	0	0	0			0	0	146	0	0	0	0	0	0	0	166	86	31.2092	1	146	0	1	1	1	0					0	0	0	0
581	A	男	82	0	1	293		0		0	1	1	0	0	0	0	0	0	0			0	0	60	0	0	0	0	0	0	0	167	62	22.231	0	60	0	0	0	1	0					0	0	0	0
582	A	男	58	0	1	381		0		0	3	1	1	1	0	0	0	0	0			0	0	146	0	0	0	0	0	0	0	180	70	21.6049	0	146	1	0	1	0	0	0	0	0	0	0	0	0	0
583	A	男	80	0	1	175		0		0	1	1	0	0	0	0	0	0	0			0	0		0	0	0	0	0	0	0						0									0	0	0	0
584	A	男	79	1	0	235	123	1	47	0	1	1	0	0	0	0	0	0	0			0	0	6	0	0	0	0	0	0	1	154	46	19.3962	0	6	0	1	1	1	1	0	0	0	1	0	1	0	0
585	A	女	79	1	0	197	97	1	58	0	1	1	0	0	0	0	0	0	0			0	0	18	0	0	0	0	0	0	1	148	60	27.3923	0	18	0	1	1	0	0	0	0	0	0	0	0	0	0
586	A	男	66	1	0	346	187	1	84	0	2	1	0	1	0	0	0	0	0			0	0	20	0	0	0	0	0	0	1	171	81	27.7008	0	20	0	0	0	0	0			0	0	0	0	0	0
587	A	男	71	1	0	380	210	1	128	0	1	1	0	0	0	0	0	0	0			0	0	14	0	0	0	0	0	0	1	161	55	21.2183	0	14	1	1	1	0	0	0	0	0	1	1	0	0	0
588	A	女	75	1	0	341	171	1	82	0	1	1	0	0	0	0	0	0	0			0	0	21	0	0	0	0	0	0	1	148	60	27.3923	0	21	0			1	0	1	1	1	1	0	0	0	0
589	A	男	74	1	0	220	107	1	57	0	1	1	0	0	0	0	0	0	0			0	0	28	0	0	0	0	0	0	1	161	63	24.3046	0	28	1	1	1	1	0	0	0	0	1	0	0	0	0
590	A	女	49	1	0	263	140	1	84	0	1	1	0	0	0	0	0	0	0			0	0	31	0	0	0	0	0	0	1	160	71	27.7344	0	31	0	0	1	1	1	0	0	0	0	0	0	1	1
591	A	男	63	1	0	349	231	1	119	0	1	0	0	1	0	0	0	0	0			0	0	32	0	0	0	0	0	0	1	175	73	23.8367	0	32	0	0	0	0	0	0	0	1	1	0	0	0	0
592	A	男	68	1	0	245	133	1	76	0	1	1	0	0	0	0	0	0	0			0	0	1	0	0	0	0	0	0	0	158	46	18.4265	0	1	0	0	1	0	0	0	0	0	1	0	0	0	0
593	A	女	78	1	0	223	122	1	74	0	1	1	0	0	0	0	0	0	0			0	0	6	0	0	0	0	0	0	1	144	41	19.7724	0	6	0	0	1	0	0	0	0	0	0	0	0	0	0
594	A	女	89	1	0	342	170	1	92	0	1	1	0	0	0	0	0	0	0			0	0	47	0	0	0	0	0	0	1	144	41	19.7724	0	47	0	0	1	1	0	0	0	0	0	0	0	0	0
595	A	男	79	1	0	296	151	1	55	0	1	1	0	0	0	0	0	0	0			0	0	44	0	0	0	0	0	0	1	155	53	22.0604	0	44	0	1	1	0	0			0	0	0	0	0	0
596	A	男	58	1	0	504	248	1	141	0	1	1	0	0	0	0	0	0	0			0	0	1	0	0	0	0	0	0	1	161	52	20.061	0	1	0	1	1	0	0	0	0	0	1	0	0	0	0
597	A	男	52	1	0	333	153	1	72	0	1	1	0	0	0	0	0	0	0			0	0	68	0	0	0	0	0	0	0	160	53	20.7031	0	68	0		1	0	0	0	0	0	0	0	0	0	0
598	A	男	73	1	0	329	181	1	110	0	1	1	0	0	0	0	0	0	0			0	0	58	0	0	0	0	0	0	1	162	47	17.9089	0	58	1	0	1		0	1	父弁膜症	0	1	0	0	0	0
599	A	女	68	1	0	332	146	1	67	0	1	1	0	0	0	0	0	0	0			0	0	92	0	0	0	0	0	0	1	155	68	28.3039	0	92	1	1	1	1	1			0	0	0	0	0	1
600	A	女	82	1	0	285	147	1	85	0	1	1	0	0	0	0	0	0	0			0	0	94	0	0	0	0	0	0	1	149	45	20.2694	0	94	0	1	1	0	0	1	1	0	0	0	0	0	0
601	A	男	79	1	0	305	157	1	87	0	1	1	0	0	0	0	0	0	0			0	0	5	0	0	0	0	0	0	1	144	40	19.2901	0	5	0	1	1	0	0					0	0	0	0
602	A	男	78	1	0	449	191	1	97	0	2	1	0	1	0	0	0	0	0			0	0	4	0	0	0	0	0	0	1	164	56	20.8209	0	4	0	0	1	1	0	0	0			0	0	0	0
603	A	男	52	1	0	275	135	1	61	0	1	1	0	0	0	0	0	0	0			0	0	105	0	0	0	0	0	0	0	167	70	25.0995	0	105	0	0	1	0	0	0	0	0		0	0	0	0
604	A	男	63	1	0	357	203	1	94	0	1	0	0	1	0	0	0	0	0			0	0	125	0	0	0	0	0	0	0	160	62	24.2188	0	125	1	1	1	1	0					0	0	0	0
605	A	男	69	1	0	324	182	1	117	0	1	1	0	0	0	0	0	0	0			0	0	96	0	0	0	0	0	0		155	49	20.3954	0	96	0	0	1	1	0	1	1	0	1	0	1	1	1
606	A	女	55	1	0	384	192	1	90	0	2	1	0	1	0	0	0	0	0			0	0	68	0	0	0	0	0	0	1	149	60	27.0258	0	68	1	0	0	1	1					1	0	0	0
607	A	男	54	1	0	356	171	1	81	0	1	1	0	0	0	0	0	0	0			0	0	86	0	0	0	0	0	0						86										0	0	0	0
608	A	男	57	1	0	306	126	1	81	0	1	1	0	0	0	0	0	0	0			0	0	36	0	0	0	0	0	0		159	54	21.3599	0	36	1	1	1	0	0					0	0	0	0
609	B	男	74	0	1	193				0	2	1	0	1	0	0	0	0	0			0	0	47.4333	0	0	0	0	0	0	0	163.2	67	25.1556	0	47.4333	0	0	1	1	0	0	0	0	1	0	0	0	0
610	B	男	55	0	0	314	131			0	3	1	0	1	1	0	0	0	0			0	0	5.86667	0	0	0	0	0	0	1	162.7	57	21.5328	0	5.86667	1	1	1	1	1	0	0	0	1	1	0	0	0
611	B	男	62	0	1	262				0	3	1	1	1	0	0	0	0	0			0	0	6.1	0	0	0	0	0	0	1	169.7	68.85	23.9078	0	6.1	0	0	1	0	0	0	0	0	1	0	0	0	0
612	B	男	80	0	1	189				0	2	1	0	1	0	0	0	0	0			0	0	38.4667	0	0	0	0	0	0	0	165.1	62.6	22.9657	0	38.4667	0	1	1	0	0	0	0	0	0	0	0	0	0
613	B	男	76	0	1	183				0	2	1	1	0	0	0	0	0	0			0	0	23.6333	0	0	0	0	0	0	1	160.3	53.8	20.937	0	23.6333	0	1	1	0	0	0	0	0	0	0	0	0	1
614	B	男	80	0	1	137				0	1	1	0	0	0	0	0	0	0			0	0	0.6	0	0	0	0	0	0	1	167.2	65.8	23.5371	0	0.6	0	1	1	1	0	0	0	0	0	0	0	1	1
615	B	男	76	0	1	144				0	1	1	0	0	0	0	0	0	0			0	0	37.3667	0	0	0	0	0	0	0	158.5	63.95	25.4555	0	37.3667	0	1	1	1	0	0	0	0	1	0	0	0	0
616	B	男	48	0	1	315				0	3	1	1	1	0	0	0	0	0			0	0	42.7333	0	0	0	0	0	0	0	182	82.5	24.9064	0	42.7333	1	1	1	1	0	1	1	0	1	1	0	0	0
617	B	女	63	1	0	312	135		92	0	1	1	0	0	0	0	0	0	0			0	0	33.4667	0	0	0	0	0	0	1	143.1	41.75	20.3881	0	33.4667	0	1	0	0	0	1	1	0	0	0	0	0	1
618	B	男	69	0	1	264				0	3	1	1	1	0	0	0	0	0			0	0	42.4333	0	0	0	0	0	0	1	167	65.5	23.486	0	42.4333	0	1	1	0	0	0	0	0	0	0	0	0	0
619	B	男	53	0	1	167				0	1	0	0	1	0	0	0	0	0			0	0	41.4333	0	0	0	0	0	0	0	168	75.05	26.5908	0	41.4333	0	1	1	0	0	0	0	0	0	1	0	0	0
620	B	男	59	1	0	455	239		102	0	1	0	0	0	0	0	0	0	0			0	0	0.4	0	0	0	0	0	0	1	171	80	27.3588	0	0.4	0	0	1	0	0	0	0	0	0	0	0	0	0
621	B	女	67	1	0	330	171		93	0	2	1	0	1	0	0	0	0	0			0	0	40.4667	0	0	0	0	0	0	1	145.5	46.2	21.8231	0	40.4667	0	1	1	0	0	0	0	0	0	0	0	0	1
622	B	男	70	1	1	290	89		31	0	1	1	0	0	0	0	0	0	0			0	0	36.3667	0	0	0	0	0	0	1	167.6	64	22.7841	0	36.3667	0	0	1	0	0	0	0	0	0	0	0	0	0
623	B	男	55	0	1	234				0	1	0	1	0	0	0	0	0	0			0	0	39.4667	0	0	0	0	0	0	1	165.9	47.9	17.4037	0	39.4667	1	0	1	0	0	0	0	0	1	1	1	0	0
624	B	男	59	1	0	356	213		151	0	2	1	0	1	0	0	0	0	0			0	0	38.3	0	0	0	0	0	0	1	164.9	65.65	24.1431	0	38.3	0	1	1	0	0	0	0	0	0	0	0	0	0
625	B	女	78	0	1	212				0	2	1	1	0	0	0	0	0	0			0	0	33.4	0	0	0	0	0	0	1	152.5	47.4	20.3816	0	33.4	0	1	1	1	1	0	0	0	0	1	0	0	0
626	B	男	60	1	0	340	149		85	0	1	1	0	0	0	0	0	0	0			0	0	36.0667	0	0	0	0	0	0	1	162	71	27.0538	0	36.0667	0	1	1	1	0	0	0	0	0	0	0	0	0
627	B	女	62	1	0	686	440		294	0	1	0	0	1	0	0	0	0	0			0	0	11.2667	0	0	0	0	0	0	1	153	47.95	20.4836	0	11.2667	0	1	1	0	0	0	0	0	0	0	0	0	1
628	B	女	61	1	1	431	183		85	0	1	1	0	0	0	0	0	0	0			0	0	35.0333	0	0	0	0	0	0	1	143.7	45.65	22.1069	0	35.0333	0	0	1	0	0	0	0	0	0	1	0	0	1
629	B	男	74	0	1	162				0	2	1	0	1	0	0	0	0	0			0	0	36.6333	0	0	0	0	0	0	0	151.7	52.2	22.6829	0	36.6333	0	1	1	1	0	0	0	0	1	0	0	0	0
630	B	男	66	0	1	197				0	2	1	1	0	0	0	0	0	0			0	0	36.8667	0	0	0	0	0	0	0	163.6	69.1	25.8173	0	36.8667	0	1	1	1	0	1	1	0	0	0	0	0	0
631	B	男	63	1	0	257	131		66	0	1	1	0	0	0	0	0	0	0			0	0	29.3333	0	0	0	0	0	0	1	176	95	30.6689	1	29.3333	0	1	1	1	0	0	0	0	0	0	0		1
632	B	男	69	0	1	206				0	1	1	0	0	0	0	0	0	0			0	0	35.9	0	0	0	0	0	0	0	159.1	64.1	25.3231	0	35.9	0	1	0	1	0	0	0	0	0	1	0	0	1
633	B	女	63	0	1	164				0	1	1	0	0	0	0	0	0	0			0	0	35.4	0	0	0	0	0	0	1	150	49.45	21.9778	0	35.4	0	1	0	0	0	0	0	0	0	1	0	0	0
634	B	男	63	0	1	184				0	1	1	0	0	0	0	0	0	0			0	0	35.0667	0	0	0	0	0	0	0	167.8	84	29.8329	0	35.0667	0	1	1	1	0	0	0	0	0	1	0	0	0
635	B	男	82	0	1	178				0	1	1	0	0	0	0	0	0	0			0	0	23.8667	0	0	0	0	0	0	1	161.1	58	22.3479	0	23.8667	1	0	1	1	1	0	0	0	0	1	0	1	1
636	B	男	63	0	1	190				0	2	0	1	0	0	0	0	0	0			0	0	32.9333	0	0	0	0	0	0	1	159	69.7	27.5701	0	32.9333	1	0	1	0	0	0	0	0	1	1	0	1	1
637	B	男	66	0	1	178				0	2	1	0	1	0	0	0	0	0			0	0	26.8	0	0	0	0	0	0	1	158.6	56.1	22.3027	0	26.8	0	1	1	0	0	0	0	0	0	0	0	0	0
638	B	男	69	0	1	309				0	4	1	1	1	0	0	0	0	0			0	0	32.1667	0	0	0	0	0	0	1	164.1	78.5	29.1509	0	32.1667	0	1	1	1	0	1	1	0	0	0	0	0	1
639	B	男	74	1	0	325	111			0	1	1	0	0	0	0	0	0	0			0	0	18.4333	0	0	0	0	0	0	1	167.8	58.9	20.9185	0	18.4333	0	0	0	1	1	0	0	0	1	1	0	0	1
640	B	男	80	0	1	192				0	2	1	1	0	0	0	0	0	0			0	0	31.6667	0	0	0	0	0	0	1	159.3	69.9	27.5452	0	31.6667	0	1	1	0	0	1	1	0	0	0	0	0	0
641	B	男	68	0	1	161				0	2	1	0	0	0	0	0	0	0			0	0	24.0667	0	0	0	0	0	0	1	167	72.9	26.1393	0	24.0667	0	0	1	1	0	0	0	0	0	1	0	0	0
642	B	男	76	1	1	284				0	1	1	0	0	0	0	0	0	0			0	0	29.6	0	0	0	0	0	0	1	166.2	51	18.4632	0	29.6	0	1	0	1	0	0	0	0	0	0	0	0	0
643	B	男	58	1	1	129				0	1	1	0	0	0	0	0	0	0			0	0	25.2333	0	0	0	0	0	0	0	173.1	70.9	23.662	0	25.2333	0	1	1	0	0	0	0	0	1	1	0	0	1
644	B	男	66	0	1	237				0	2	1	1	0	0	0	0	0	0			0	0	23.9667	0	0	0	0	0	0	0	156.6	63.05	25.71	0	23.9667	0	1	1	0	0	0	0	0	0	0	0	0	0
645	B	男	64	0	1	219				0	2	1	1	0	0	0	0	0	0			0	0	24.1667	0	0	0	0	0	0	0	176	67	21.6296	0	24.1667	0	1	0	0	0	0	0	0	0	0	0	0	0
646	B	男	84	0	1	179				0	1	1	0	0	0	0	0	0	0			0	0	0.2	0	0	0	0	0	0	1	155	69.05	28.7409	0	0.2	0	0	1	0	0	0	0	0	0	0	0	0	1
647	B	女	71	1	0	411	245		111	0	1	1	0	0	0	0	0	0	0			0	0	24.9667	0	0	0	0	0	0	1	153	42	17.9418	0	24.9667	0	1	1	0	0	0	0	0	0	0	0	0	0
648	B	男	53	0	1	331				0	1	1	0	0	0	0	0	0	0			0	0	8.96667	0	0	0	0	0	0	1	162.8	51.5	19.4311	0	8.96667	1	1	1	0	0	0	0	0	1	1	0	0	0
649	B	男	63	0	1	351				0	4	1	1	1	0	0	0	0	0			0	0	24.8	0	0	0	0	0	0	1	175	83.9	27.3959	0	24.8	0	1	1	0	0	0	0	0	0	0	0	0	0
650	B	男	48	0	1	269				0	4	1	1	1	0	0	0	0	0			0	0	18.4	0	0	0	0	0	0	0	175.8	89	28.7973	0	18.4	1	1	1	1	1	1	1	0	1	0	0	0	0
651	B	男	82	0	1	232				0	3	1	1	0	0	0	0	0	0			0	0	24.2333	0	0	0	0	0	0	1	161.8	55	21.009	0	24.2333	0	1	1	1	0	0	0	0	0	0	0	0	0
652	B	男	65	0	1	256				0	3	1	1	0	0	0	0	0	0			0	0	24.4667	0	0	0	0	0	0	0	169.5	64.65	22.5024	0	24.4667	0	1	1	0	0	0	0	0	0	1	0	0	0
653	B	男	25	0	1	493				0	4	0	0	1	1	0	0	0	0			0	0	17.7	0	0	0	0	0	0	1	164.1	53.29	19.7892	0	17.7	1	0	0	0	0	0	0	0	0	0	0	0	0
654	B	男	83	1	1	312	128		69	0	1	1	0	0	0	0	0	0	0			0	0	4.3	0	0	0	0	0	0	1	150.8	41.05	18.0514	0	4.3	1	0	0	0	0	0	0	0	0	0	0	0	1
655	B	女	79	0	1	252				0	2	1	1	0	0	0	0	0	0			0	0	21.4333	0	0	0	0	0	0	1	152.2	62.5	26.9805	0	21.4333	0	0	1	0	0	1	1	0	0	1	0	0	1
656	B	男	72	0	1	117				0	1	1	0	0	0	0	0	0	0			0	0	18.6333	0	0	0	0	0	0	0	162.6	64.5	24.396	0	18.6333	1	1	1	0	0	1	1	0	0	1	0	0	0
657	B	男	79	0	1	155				0	1	1	0	0	0	0	0	0	0			0	0	22.4333	0	0	0	0	0	0	0	151.5	45.5	19.8238	0	22.4333	0	1	0	1	0	0	0	0	0	0	1	0	0
658	B	男	80	1	0	559	264		133	0	1	1	0	0	0	0	0	0	0			0	0	19.5	0	0	0	0	0	0	1	157.3	69.1	27.9268	0	19.5	0	1	1	0	0	0	0	0	0	0	0	0	0
659	B	男	73	1	0	556	224		99	0	1	1	0	0	0	0	0	0	0			0	0	17.3	0	0	0	0	0	0	1	162.2	66.3	25.2007	0	17.3	0	1	1	0	0	0	0	0	0	0	0	0	1
660	B	男	45	0	1	262				0	3	1	1	1	0	0	0	0	0			0	0	18.9333	0	0	0	0	0	0	0	173	82.2	27.465	0	18.9333	0	1	1	1	0	0	0	0	1	0	0	0	0
661	B	女	72	0	1	195				0	2	1	1	0	0	0	0	0	0			0	0	18.4667	0	0	0	0	0	0	1	152	48.3	20.9055	0	18.4667	0	1	1	0	0	0	0	0	1	0	0	0	0
662	B	男	82	0	1	157				0	1	1	0	0	0	0	0	0	0			0	0	18.6	0	0	0	0	0	0	0	163.2	70.2	26.3571	0	18.6	0	1	1	1	0	0	0	0	0	0	1	0	1
663	B	男	64	0	1	259				0	3	1	1	1	0	0	0	0	0			0	0	20.2	0	0	0	0	0	0	0	180	78.7	24.2901	0	20.2	0	1	1	0	0	1	1	0	0	1	0	0	1
664	B	男	46	0	1	217				0	2	1	1	0	0	0	0	0	0			0	0	12.6	0	0	0	0	0	0	0	172.9	72.65	24.3022	0	12.6	0	1	0	0	0	0	0	1	1	0	0	0	0
665	B	女	60	0	1	261				0	1	1	0	0	0	0	0	0	0			0	0	15.2	0	0	0	0	0	0	1	160.4	76.2	29.6174	0	15.2	0	1	1	1	1	0	0	0	0	0	0	1	1
666	B	女	78	0	1	258				0	3	1	1	1	0	0	0	0	0			0	0	19.0667	0	0	0	0	0	0	0	139.6	47.3	24.2711	0	19.0667	0	1	1	0	0	0	0	0	0	0	0	0	0
667	B	男	42	0	1	295				0	4	1	1	1	0	0	0	0	0			0	0	17.9333	0	0	0	0	0	0	0	170.9	82.9	28.3838	0	17.9333	1	1	1	0	0	0	0	0	0	1	0	0	0
668	B	女	83	1	0	395	231		114	0	1	1	0	0	0	0	0	0	0			0	0	3.1	0	0	0	0	0	0	1	142.3	56.3	27.8034	0	3.1	0	1	1	1	0	0	0	0	0	0	0	0	0
669	B	女	71	1	0	257	151		84	0	1	0	0	1	0	0	0	0	0			0	0	17.5333	0	0	0	0	0	0	1	147.6	44.25	20.3114	0	17.5333	0	1	1	0	0	0	0	0	0	1	0	0	0
670	B	男	56	0	1	266				0	3	1	1	1	0	0	0	0	0			0	0	12.9667	0	0	0	0	0	0	0	174	78	25.763	0	12.9667	0	1	0	0	0	1	1	0	0	0	0	0	0
671	B	男	71	0	1	233				0	2	1	1	0	0	0	0	0	0			0	0	16.2333	0	0	0	0	0	0	0	174.5	72.35	23.7601	0	16.2333	0	1	1	1	1	0	0	0	0	1	1	1	1
672	B	女	80	0	1	288				0	3	1	1	1	0	0	0	0	0			0	0	12.1667	0	0	0	0	0	0	1	146.2	61.2	28.6323	0	12.1667	0	1	1	1	0	0	0	0	0	0	0	0	0
673	B	男	66	0	1	237				0	3	1	1	1	0	0	0	0	0			0	0	17.5667	0	0	0	0	0	0	0	166.9	79.2	28.4323	0	17.5667	0	1	1	0	0	0	0	0	0	1	0	0	0
674	B	男	70	0	1	228				0	2	1	1	0	0	0	0	0	0			0	0	10.2333	0	0	0	0	0	0	1	171.1	67.55	23.0741	0	10.2333	0	1	1	0	0	0	0	0	0	0	0	0	0
675	B	男	63	0	1	292				0	3	1	1	1	0	0	0	0	0			0	0	15.6667	0	0	0	0	0	0	0	167.7	74.6	26.5261	0	15.6667	0	1	1	1	0	0	0	0	0	0	0	0	0
676	B	男	73	0	1	270				0	4	1	1	1	0	0	0	0	0			0	0	12.3333	0	0	0	0	0	0	0	159	52.2	20.6479	0	12.3333	0	1	1	1	0	0	0	0	0	0	0	0	0
677	B	男	55	0	1	262				0	2	1	1	0	0	0	0	0	0			0	0	15.0333	0	0	0	0	0	0	0	172.9	70.5	23.583	0	15.0333	0	1	0	0	0	0	0	0	1	0	0	0	0
678	B	男	51	0	1	325				0	4	1	1	1	0	0	0	0	0			0	0	11.9333	0	0	0	0	0	0	1	169	81.6	28.5704	0	11.9333	1	1	1	1	1	0	0	0	0	0	0	0	1
679	B	男	62	0	1	146				0	1	1	0	0	0	0	0	0	0			0	0	14.5667	0	0	0	0	0	0	0	160.3	62.3	24.2449	0	14.5667	1	1	1	1	0	1	1	0	0	1	0	0	0
680	B	男	46	0	1	173				0	1	1	0	0	0	0	0	0	0			0	0	14	0	0	0	0	0	0	1	177	79.2	25.2801	0	14	0	0	1	1	0	0	0	0	0	0	0	1	1
681	B	女	70	1	0	437	193		83	0	3	1	1	1	0	0	0	0	0			0	0	12.5667	0	0	0	0	0	0	1	156.4	72.1	29.4755	0	12.5667	0	1	1	0	0	0	0	0	0	0	0	0	0
682	B	女	80	0	1	168				0	2	1	1	0	0	0	0	0	0			0	0	12.8	0	0	0	0	0	0	1	151.1	45.7	20.0165	0	12.8	1	1	1	0	0	0	0	0	0	0	0	0	1
683	B	女	78	1	0	334	179		101	0	1	1	0	0	0	0	0	0	0			0	0	12.8333	0	0	0	0	0	0	1	147.7	47.5	21.7737	0	12.8333	0	1	1	0	0	0	0	0	0	0	0	0	0
684	B	男	55	0	1	258				0	3	1	1	1	0	0	0	0	0			0	0	12.3333	0	0	0	0	0	0	0	177.5	70.5	22.3765	0	12.3333	0	1	1	1	0	0	0	0	0	0	0	0	0
685	B	男	74	0	1	287				0	5	1	1	1	0	0	0	0	0			0	0	12.1	0	0	0	0	0	0	1	163.4	56.8	21.2738	0	12.1	0	1	1	0	0	0	0	0	0	0	0	0	0
686	B	男	76	0	1	318				0	5	1	1	1	0	0	0	0	0			0	0	11.9333	0	0	0	0	0	0	1	165.6	62.7	22.8637	0	11.9333	0	1	1	0	0	0	0	0	0	0	0	0	1
687	B	男	64	0	1	252				0	2	1	1	0	0	0	0	0	0			0	0	0.433333	0	0	0	0	0	0	1	157.2	52.3	21.1639	0	0.433333	1	1	0	0	0	0	0	0	1	1	0	1	1
688	B	女	53	1	0	389	242		144	0	1	0	1	0	0	0	0	0	0			0	0	9.86667	0	0	0	0	0	0	1	177.1	78.85	25.14	0	9.86667	1	1	1	1	0	0	0	0	0	1	0	1	1
689	B	男	68	0	1	236				0	3	1	1	1	0	0	0	0	0			0	0	10.2667	0	0	0	0	0	0	1	162.4	58.85	22.3138	0	10.2667	0	1	1	1	0	0	0	0	1	0	1	0	1
690	B	男	72	0	1	196				0	2	1	1	0	0	0	0	0	0			0	0	7.8	0	0	0	0	0	0	0	160.1	58.1	22.667	0	7.8	0	1	0	1	0	0	0	0	0	0	0	0	0
691	B	男	52	0	1	226				0	3	1	1	0	0	0	0	0	0			0	0	5.16667	0	0	0	0	0	0	0	172.2	82.1	27.6871	0	5.16667	0	0	1	0	0	0	0	0	1	0	0	0	0
692	B	男	80	1	1	325	134		93	0	1	1	0	0	0	0	0	0	0			0	0	6.16667	0	0	0	0	0	0	1	156	54.8	22.5181	0	6.16667	0	0	1	0	0	0	0	0	0	0	0	0	1
693	B	男	48	0	1	270				0	3	1	1	1	0	0	0	0	0			0	0	6.03333	0	0	0	0	0	0	0	165.4	80.5	29.4256	0	6.03333	1	1	1	0	0	0	0	1	1	0	0	0	0
694	B	男	79	0	1	264				0	3	1	1	1	0	0	0	0	0			0	0	5.8	0	0	0	0	0	0	1	164	64.6	24.0184	0	5.8	0	1	1	1	0	0	0	0	1	1	0	0	0
695	B	男	54	1	1	452	187		239	0	1	1	0	0	0	0	0	0	0			0	0	6.4	0	0	0	0	0	0	1	170.5	79.9	27.4851	0	6.4	0	1	1	0	0	0	0	0	0	0	1	0	0
696	B	男	58	0	1	282				0	3	1	1	1	0	0	0	0	0			0	0	1.7	0	0	0	0	0	0	1	170	91	31.4879	1	1.7	0	1	1	1	0	0	0	0	0	0	0	0	0
697	B	男	73	1	0	377	205		101	0	2	1	0	1	0	0	0	0	0			0	0	0.6	0	0	0	0	0	0	1	155.2	55.8	23.166	0	0.6	1	1	1	0	0	0	0	0	0	0	1	0	0
698	B	男	67	0	1	205				0	2	1	1	0	0	0	0	0	0			0	0	3.36667	0	0	0	0	0	0	0	166	55.2	20.0319	0	3.36667	0	1	1	0	0	0	0	0	0	0	0	0	1
699	B	男	42	0	0	378	186			0	3	1	1	1	0	0	0	0	0			0	0	1.4	0	0	0	0	0	0	1	141.1	41.6	20.8949	0	1.4	1	1	1	0	0	1	1	0	1	0	0	0	1
700	B	女	81	0	1	118				0	1	1	0	0	0	0	0	0	0			0	0	2.53333	0	0	0	0	0	0	1	135.1	45.1	24.7096	0	2.53333	0	1	1	0	0	1	1	0	0	0	0	0	1
701	B	女	46	0	0	238	74			0	3	1	0	1	0	0	0	0	0			0	0	3.2	0	0	0	0	0	0	1	170	59	20.4152	0	3.2	0	0	0	0	0	0	0	0	0	0	0	0	0
702	B	男	50	0	1	283				0	3	1	1	1	0	0	0	0	0			0	0	0.7	0	0	0	0	0	0	0	169.6	87	30.246	1	0.7	0	1	1	1	0	1	1	0	0	0	0	0	0
703	B	女	59	0	1	176				0	2	1	1	0	0	0	0	0	0			0	0	0.6	0	0	0	0	0	0	0	154.8	53.8	22.4512	0	0.6	0	1	1	1	0	1	1	0	0	0	0	0	0
704	B	女	82	0	1	198				0	2	1	1	0	0	0	0	0	0			0	0	0.266667	0	0	0	0	0	0	0	139.2	46.85	24.1786	0	0.266667	0	1	1	0	0	0	0	0	0	0	0	0	0
705	B	女	84	0	1	164				0	2	1	0	0	0	0	0	0	0			0	0	20	0	0	0	0	0	0	1	128	35.2	21.4844	0	20	0	1	1	0	0	0	0	0	0	1	0	0	0
706	B	男	65	0	1	203				0	2	1	1	0	0	0	0	0	0			0	0	19	0	0	0	0	0	0	0	177.4	86	27.327	0	19	0	1	1	1	1	0	0	0	0	1	0	0	0
707	B	男	55	0	1	186				0	2	1	1	0	0	0	0	0	0			0	0	18	0	0	0	0	0	0	1	178.4	78.8	24.7592	0	18	0	1	1	1	0	0	0	0	1	1	0	0	0
708	B	男	71	0	1	230				0	2	1	1	0	0	0	0	0	0			0	0	17	0	0	0	0	0	0	0	159.9	59.2	23.1539	0	17	1	1	1	1	0	0	0	0	0	0	0	0	0
709	B	女	76	1	0	359	73		181	0	1	1	0	0	0	0	0	0	0			0	0	17	0	0	0	0	0	0	1	138.5	39.8	20.7483	0	17	0	1	1	1	0	1	1	0	0	0	0	0	0
710	B	男	69	0	1	152				0	1	1	0	0	0	0	0	0	0			0	0	17	0	0	0	0	0	0	0	166.7	71.4	25.6937	0	17	0	1	1	0	0	0	0	1	1	0	0	0	1
711	B	男	59	0	1	182				0	2	1	1	0	0	0	0	0	0			0	0	16	0	0	0	0	0	0	0	176.1	76.1	24.5395	0	16	1	1	1	0	0	0	0	0	1	0	1	0	0
712	B	男	80	0	1	227				0	2	1	1	0	0	0	0	0	0			0	0	16	0	0	0	0	0	0	1	152.4	55.8	24.025	0	16	1	1	1	0	0	0	0	0	0	1	0	0	1
713	B	男	70	0	1	205				0	2	1	1	0	0	0	0	0	0			0	0	16	0	0	0	0	0	0	0	162	58	22.1003	0	16	0	0	1	0	0	0	0	0	0	0	0	0	0
714	B	男	53	0	1	165				0	1	0	1	0	0	0	0	0	0			0	0	15	0	0	0	0	0	0	0	164.8	60.2	22.1657	0	15	0	1	1	0	0	0	0	0	1	0	0	0	0
715	B	男	70	1	0	294	153		85	0	1	1	0	0	0	0	0	0	0			0	0	15	0	0	0	0	0	0	0	175	65	21.2245	0	15	0	1	1	0	0	1	1	0	0	0	1	1	1
716	B	男	67	0	1	194				0	2	1	1	0	0	0	0	0	0			0	0	13	0	0	0	0	0	0	1	165.8	47.7	17.352	0	13	0	0	1	0	0	0	0	0	0	0	0	0	0
717	B	男	70	0	1	198				0	2	1	1	0	0	0	0	0	0			0	0	9	0	0	0	0	0	0		165.1	52.7	19.3338	0	9	0	1	1	1	0	0	0	0	0	0	0	0	0
718	B	男	75	0	1	172				0	1	1	0	0	0	0	0	0	0			0	0	9	0	0	0	0	0	0		164.5	53	19.5859	0	9	0	0	0	1	0	0	0	1	1	1	0	0	0
719	B	男	82	0	1	159				0	1	1	0	0	0	0	0	0	0			0	0	9	0	0	0	0	0	0		160	69.1	26.9922	0	9	0	0	1	0	0	0	0	0	0	0	0	0	1
[truncated: 34 more columns]
